# Supplementary material for: Antagonistic Interactions between Benzo[a]pyrene and C<sub>60</sub> in Toxicological Response of Marine Mussels
Source: Preprints.org preprint supplement (doi:10.20944/preprints201905.0180.v1), 2019-05-15
Supplement: Supplementary file 1 [file supplementary]

## Sheet: DEP
Treatment	UNIPROTKB	LogFC	D	p.value	adjp
BaP (5 µg)	A0A210PE39	0.288843	1.01427	4.93e-08	3.6e-05
BaP (5 µg)	A0A210PSC6	0.288843	1.01427	4.93e-08	3.6e-05
BaP (5 µg)	A0A210Q6H5	0.340123	1.52689	2.64e-08	3.6e-05
BaP (5 µg)	A0A210QC51	0.269734	0.937288	6.41e-08	3.6e-05
BaP (5 µg)	K1Q8A2	-0.222119	0.60359	1.05e-07	4.72e-05
BaP (5 µg)	A0A210Q2X8	0.47832	2.96909	2.5e-05	0.00533289
BaP (5 µg)	A0A210QCZ3	-0.0521944	0.0373009	3.73e-05	0.00533289
BaP (5 µg)	A0A210QPL9	-0.0521944	0.0392641	3.73e-05	0.00533289
BaP (5 µg)	A0A210QWZ5	-0.0521944	0.0431905	3.73e-05	0.00533289
BaP (5 µg)	A0A210R250	-0.0521944	0.0412273	3.73e-05	0.00533289
BaP (5 µg)	A0A210R4U6	-0.0521944	0.0392641	3.73e-05	0.00533289
BaP (5 µg)	K1QCK9	-0.0521944	0.0392641	3.73e-05	0.00533289
BaP (5 µg)	Q3S334	-0.0521944	0.0451537	3.73e-05	0.00533289
BaP (5 µg)	A0A210QUG1	-0.491079	3.03789	3.8e-05	0.00533289
BaP (5 µg)	K1QYR5	-0.514538	3.36246	3.22e-05	0.00533289
BaP (5 µg)	K1QLK3	-0.514538	3.36246	3.24e-05	0.00533289
BaP (5 µg)	A0A210PQT9	-0.517858	3.18261	4.69e-05	0.00619406
BaP (5 µg)	A0A210PV79	-0.563156	3.64159	5.84e-05	0.00728628
BaP (5 µg)	A0A210QH95	0.385211	1.9892	0.000104827	0.00780421
BaP (5 µg)	A0A210QW43	0.438131	2.29307	9.41e-05	0.00780421
BaP (5 µg)	A0A210R1X3	0.38669	1.88018	8.62e-05	0.00780421
BaP (5 µg)	K1Q2U2	0.362843	1.75135	8.91e-05	0.00780421
BaP (5 µg)	K1R543	0.468638	2.90373	8.81e-05	0.00780421
BaP (5 µg)	A0A210PE05	-0.505912	3.31293	8.57e-05	0.00780421
BaP (5 µg)	A0A210PH94	-0.418322	2.14918	0.000102087	0.00780421
BaP (5 µg)	A0A210PQN6	-0.418322	2.14918	0.000102087	0.00780421
BaP (5 µg)	A0A210Q1V7	-0.418322	2.14918	8.38e-05	0.00780421
BaP (5 µg)	A0A210QN44	-0.499653	3.08422	9.59e-05	0.00780421
BaP (5 µg)	A0A2T6NJE1	-0.435523	2.39565	0.000107812	0.00780421
BaP (5 µg)	K1R5L7	-0.397969	2.06014	0.000100997	0.00780421
BaP (5 µg)	A0A210QJZ0	-0.442984	2.43088	8.21e-05	0.00780421
BaP (5 µg)	K1QW23	-0.592763	4.48407	0.000122859	0.00861548
BaP (5 µg)	A0A210QR12	-0.546959	3.75736	0.000126888	0.00862835
BaP (5 µg)	A0A210PS67	0.510742	3.3472	0.000167697	0.00945769
BaP (5 µg)	K1QXG6	0.543909	3.75241	0.000156507	0.00945769
BaP (5 µg)	A0A210PEG2	-0.546959	3.75736	0.000168586	0.00945769
BaP (5 µg)	A0A210QCM1	-0.588247	4.00824	0.00015662	0.00945769
BaP (5 µg)	A0A210QFK7	-0.580126	4.17885	0.000161311	0.00945769
BaP (5 µg)	K1Q4U3	-0.349875	1.56581	0.000162422	0.00945769
BaP (5 µg)	K1Q148	-0.556667	3.81637	0.00014551	0.00945769
BaP (5 µg)	K1S6V7	-0.404496	2.08868	0.000183777	0.00981893
BaP (5 µg)	Q8I6N2	-0.404496	2.08868	0.000183777	0.00981893
BaP (50 µg)	A0A210R4M3	-0.64514	4.63376	1.09e-08	2.07e-05
BaP (50 µg)	A0A210QMB2	0.532398	3.33649	1.92e-08	2.07e-05
BaP (50 µg)	A0A2T6MZ82	-0.455662	2.34659	4.17e-08	2.85e-05
BaP (50 µg)	A0A210Q912	0.413754	2.20924	5.3e-08	2.85e-05
BaP (50 µg)	A0A1L5IZD6	-0.367606	1.82379	9.62e-08	3.6e-05
BaP (50 µg)	K1QW73	0.339753	1.45154	1.17e-07	3.6e-05
BaP (50 µg)	A0A0C5PIX4	0.339753	1.45154	1.17e-07	3.6e-05
BaP (50 µg)	K1QTL2	-0.300492	1.19091	2.12e-07	5.7e-05
BaP (50 µg)	A0A210QWZ2	0.261751	0.838325	3.35e-07	8.01e-05
BaP (50 µg)	A0A210QAQ1	0.165826	0.386355	2.1e-06	0.00045146
BaP (50 µg)	A0A210QY73	-0.142639	0.270093	4.02e-06	0.000786675
BaP (50 µg)	K1RGE5	0.737161	6.38135	6.37e-06	0.00114206
BaP (50 µg)	A0A210Q6X3	-0.515857	3.30646	2.14e-05	0.00282716
BaP (50 µg)	K1Q9D7	0.0918258	0.115439	2.23e-05	0.00282716
BaP (50 µg)	A0A210QH19	0.0918258	0.115439	2.23e-05	0.00282716
BaP (50 µg)	A0A210PUV5	0.630246	4.83863	2.15e-05	0.00282716
BaP (50 µg)	K1R773	0.653705	5.24851	2.16e-05	0.00282716
BaP (50 µg)	K1RXD0	-0.885454	8.42651	2.57e-05	0.00307755
BaP (50 µg)	A0A210PMU2	0.437601	2.49197	4.16e-05	0.00350228
BaP (50 µg)	A0A210QIB4	0.482616	2.88674	4.21e-05	0.00350228
BaP (50 µg)	A0A2T6N2Z8	0.641164	4.90724	3.92e-05	0.00350228
BaP (50 µg)	K1PB15	0.46106	2.78913	4.23e-05	0.00350228
BaP (50 µg)	K1PIB7	0.514517	3.46532	3.87e-05	0.00350228
BaP (50 µg)	K1Q1U7	0.514517	3.46532	3.87e-05	0.00350228
BaP (50 µg)	A0A210QJW4	0.609674	4.70947	3.73e-05	0.00350228
BaP (50 µg)	K1Q7T5	0.529231	3.76371	3.89e-05	0.00350228
BaP (50 µg)	A0A2T9ZPN8	0.572452	4.00503	4.89e-05	0.00376382
BaP (50 µg)	K1PU05	0.572452	4.00503	4.89e-05	0.00376382
BaP (50 µg)	A0A210R1U2	-0.526304	3.53634	7.71e-05	0.00395804
BaP (50 µg)	A0A210R3X2	-0.470053	2.70255	5.88e-05	0.00395804
BaP (50 µg)	A0A2T6NK97	-0.470053	2.70255	5.88e-05	0.00395804
BaP (50 µg)	A0A210PGC7	0.475154	2.85289	6.27e-05	0.00395804
BaP (50 µg)	A0A210PPR5	0.444128	2.51913	7.26e-05	0.00395804
BaP (50 µg)	A0A210Q336	0.567164	3.74159	6.71e-05	0.00395804
BaP (50 µg)	A0A210QR66	0.572452	4.00503	7.01e-05	0.00395804
BaP (50 µg)	A0A210R5N7	0.444128	2.51913	7.26e-05	0.00395804
BaP (50 µg)	B0YLF5	0.465284	2.60763	7.91e-05	0.00395804
BaP (50 µg)	K1PE41	0.465284	2.60763	7.91e-05	0.00395804
BaP (50 µg)	Q8ITC4	0.444128	2.51913	7.26e-05	0.00395804
BaP (50 µg)	A0A210PPX5	0.514517	3.46532	7.69e-05	0.00395804
BaP (50 µg)	A0A2T6MZP6	0.545544	3.85464	6.77e-05	0.00395804
BaP (50 µg)	K1QSN0	0.539285	3.59504	6.36e-05	0.00395804
BaP (50 µg)	K1R4P6	0.444128	2.51913	7.26e-05	0.00395804
BaP (50 µg)	A5LGG7	0.713314	5.92544	8.38e-05	0.00410182
BaP (50 µg)	A0A210QSN2	-0.652917	4.89103	0.000100099	0.00433525
BaP (50 µg)	A0A210Q459	0.364844	1.68863	0.00010131	0.00433525
BaP (50 µg)	A0A210QYX5	0.407328	2.00281	9.71e-05	0.00433525
BaP (50 µg)	A0A210R319	0.389506	1.94133	9.62e-05	0.00433525
BaP (50 µg)	K1PJ96	0.577253	4.74343	0.000102693	0.00433525
BaP (50 µg)	K1QWH8	0.524785	3.07915	9.48e-05	0.00433525
BaP (50 µg)	K1PLY4	0.427429	2.07288	0.000101902	0.00433525
BaP (50 µg)	K1QCC1	0.713314	5.92544	0.00010704	0.00443186
BaP (50 µg)	K1R9F7	0.384007	1.9225	0.000118417	0.00481041
BaP (50 µg)	K1QKI2	-0.0601773	0.0494815	0.000121878	0.00485931
BaP (50 µg)	K1QC39	0.401154	1.98144	0.000128726	0.00486223
BaP (50 µg)	K1RDQ4	0.596298	4.38212	0.000124335	0.00486223
BaP (50 µg)	K1QG42	0.498451	2.9588	0.000127313	0.00486223
BaP (50 µg)	A0A210PS67	-0.504277	3.22209	0.000139012	0.00494348
BaP (50 µg)	K1QRV0	-0.493137	2.85539	0.000133439	0.00494348
BaP (50 µg)	K1QT67	-0.57299	4.06114	0.000153125	0.00494348
BaP (50 µg)	K1R412	-0.459189	2.63066	0.000137969	0.00494348
BaP (50 µg)	A0A210Q1U2	0.499001	3.17283	0.000142816	0.00494348
BaP (50 µg)	K1QFC9	0.465284	2.60763	0.000150143	0.00494348
BaP (50 µg)	K1QQR8	0.52246	3.50686	0.000153838	0.00494348
BaP (50 µg)	Q8I6N2	0.465284	2.60763	0.000150143	0.00494348
BaP (50 µg)	Q967M3	0.786971	7.97025	0.000146972	0.00494348
BaP (50 µg)	A0A210QY06	0.444128	2.51913	0.000144162	0.00494348
BaP (50 µg)	A0A210PZ32	0.370127	1.70483	0.000156627	0.00495908
BaP (50 µg)	A0A140H122	0.389506	1.94133	0.000167492	0.00520816
BaP (50 µg)	A0A210Q9M5	0.401154	1.98144	0.000171751	0.00520816
BaP (50 µg)	A0A210R3F1	0.499001	3.17283	0.000170266	0.00520816
BaP (50 µg)	K1QUP0	-0.516983	3.164	0.000174294	0.00521187
BaP (50 µg)	A0A194AKT3	0.548204	3.64187	0.000179851	0.00530438
BaP (50 µg)	K1R646	-0.54289	3.34419	0.000184586	0.00537046
BaP (50 µg)	K1RYZ3	-0.47111	2.84503	0.000190593	0.00543198
BaP (50 µg)	K1PAK8	0.52246	3.50686	0.000191747	0.00543198
BaP (50 µg)	K1RGF5	0.52246	3.50686	0.000194591	0.00544097
BaP (50 µg)	A0A210Q5H2	0.384007	1.9225	0.000240509	0.00632953
BaP (50 µg)	A0A210QEG3	0.370127	1.70483	0.000244009	0.00632953
BaP (50 µg)	A0A2T6NIL6	0.370127	1.70483	0.000244009	0.00632953
BaP (50 µg)	K1QDU3	0.467974	2.82038	0.000235255	0.00632953
BaP (50 µg)	K1QZ49	0.852638	8.20604	0.000241684	0.00632953
BaP (50 µg)	A0A210PRE1	0.370127	1.70483	0.000244009	0.00632953
BaP (50 µg)	A0A210QJA3	0.401154	1.98144	0.000250671	0.00642004
BaP (50 µg)	K1QBM0	0.314218	1.2305	0.000253462	0.00642004
BaP (50 µg)	A0A210PPR8	-0.330865	1.42856	0.000275682	0.00643423
BaP (50 µg)	A0A210QIJ3	-0.361892	1.69058	0.00029158	0.00643423
BaP (50 µg)	A0A210QVV1	-0.441048	2.63621	0.000267352	0.00643423
BaP (50 µg)	A0A210R250	-0.361892	1.69058	0.00029158	0.00643423
BaP (50 µg)	A0A2T6NCW6	-0.3888	1.84098	0.000277606	0.00643423
BaP (50 µg)	K1PLE6	-0.347058	1.51331	0.000272217	0.00643423
BaP (50 µg)	K1PEP6	-0.419136	2.01102	0.000265245	0.00643423
BaP (50 µg)	K1PLV3	-0.355633	1.55827	0.000266514	0.00643423
BaP (50 µg)	A0A0K0YB12	0.35486	1.65822	0.000295861	0.00643423
BaP (50 µg)	A0A210Q026	0.467974	2.82038	0.000291582	0.00643423
BaP (50 µg)	A0A210QVG5	0.310006	1.22088	0.000288401	0.00643423
BaP (50 µg)	K1PXH9	0.467974	2.82038	0.000291582	0.00643423
BaP (50 µg)	K1RAG6	0.35486	1.65822	0.000295861	0.00643423
BaP (50 µg)	K1QG87	0.314218	1.2305	0.000262768	0.00643423
BaP (50 µg)	A0A210PUQ4	0.41988	2.23253	0.000313488	0.00644473
BaP (50 µg)	A0A210QEG9	0.515634	3.03726	0.000319378	0.00644473
BaP (50 µg)	A0A210QL78	0.288223	1.02594	0.000305579	0.00644473
BaP (50 µg)	A0A2T6NCM4	0.653705	5.24851	0.000320291	0.00644473
BaP (50 µg)	K1PYA0	0.711554	6.19478	0.0003076	0.00644473
BaP (50 µg)	K1QE21	0.653705	5.24851	0.000320291	0.00644473
BaP (50 µg)	K1R8A0	0.370127	1.70483	0.0003097	0.00644473
BaP (50 µg)	G8IPR9	0.490375	2.92202	0.000302948	0.00644473
BaP (50 µg)	K1QWZ4	0.606399	4.44213	0.000328516	0.00654903
BaP (50 µg)	A0A210Q0N0	-0.448743	2.56156	0.000377797	0.00683564
BaP (50 µg)	A0A2T6NAC5	-0.0456777	0.0315199	0.000358295	0.00683564
BaP (50 µg)	K1PF31	-0.415134	1.87159	0.000370242	0.00683564
BaP (50 µg)	A0A210QGM0	-0.47111	2.84503	0.000363951	0.00683564
BaP (50 µg)	A0A210PJS9	0.450907	2.54742	0.000377818	0.00683564
BaP (50 µg)	K1Q1X5	0.450907	2.54742	0.000377818	0.00683564
BaP (50 µg)	K1QCS7	0.450907	2.54742	0.000377818	0.00683564
BaP (50 µg)	K1RYJ6	0.700635	5.83725	0.000352418	0.00683564
BaP (50 µg)	A0A210PGG4	0.450907	2.54742	0.000372445	0.00683564
BaP (50 µg)	A0A210QBH5	0.639314	4.63795	0.000364487	0.00683564
BaP (50 µg)	K1R3N7	0.750789	6.48063	0.000370038	0.00683564
BaP (50 µg)	A0A210QJH6	-0.468889	2.56011	0.000385838	0.00692258
BaP (50 µg)	A0A210Q0G0	0.472916	2.63969	0.00040267	0.00716487
BaP (50 µg)	A0A2T6N947	0.292124	1.03335	0.000416627	0.00735245
BaP (50 µg)	A0A210PQA4	0.323151	1.25114	0.000421613	0.00737994
BaP (50 µg)	A0A0M4TZ63	-0.64514	5.0199	0.000432679	0.00745991
BaP (50 µg)	A0A210PU39	0.599973	4.64861	0.000433185	0.00745991
BaP (50 µg)	A0A210R0R7	0.439749	2.30852	0.000436576	0.00745991
BaP (50 µg)	A0A210Q083	-0.436106	2.35411	0.000450168	0.00757196
BaP (50 µg)	A0A210Q124	0.734274	6.64943	0.000447125	0.00757196
BaP (50 µg)	A0A210QER2	0.41988	2.23253	0.000457153	0.00762986
BaP (50 µg)	A0A210Q9D4	0.724094	6.28615	0.000480543	0.00795853
BaP (50 µg)	A0A194AM72	0.506863	3.21126	0.000486743	0.00799968
BaP (50 µg)	A0A210PEN6	-0.298964	1.10458	0.000499848	0.00810658
BaP (50 µg)	K1QJN4	0.654762	5.51828	0.000500778	0.00810658
BaP (50 µg)	K1PXS8	0.359759	1.6731	0.000527087	0.00840607
BaP (50 µg)	K1QUJ1	0.484143	3.10037	0.000525401	0.00840607
BaP (50 µg)	K1RGF7	-0.353585	1.64425	0.000531833	0.00841939
BaP (50 µg)	A0A210QK21	-0.402939	2.03313	0.000565905	0.00854561
BaP (50 µg)	A0A210QN44	0.395218	1.96096	0.000549351	0.00854561
BaP (50 µg)	A0A210QNS4	0.539285	3.59504	0.000553261	0.00854561
BaP (50 µg)	A0A210QTG3	0.554169	3.90279	0.000564656	0.00854561
BaP (50 µg)	B2X7S0	0.426245	2.2568	0.000567591	0.00854561
BaP (50 µg)	K1QV19	0.506863	3.21126	0.000558587	0.00854561
BaP (50 µg)	K1QK89	0.288223	1.02594	0.000546152	0.00854561
BaP (50 µg)	A0A210PLA9	0.413754	2.20924	0.000579667	0.00857947
BaP (50 µg)	A0A210R3Y4	0.514517	3.46532	0.000576829	0.00857947
BaP (50 µg)	A0A2U0A7A1	0.310006	1.22088	0.000581794	0.00857947
BaP (50 µg)	A0A210R0I7	0.202009	0.641783	0.000629203	0.00886574
BaP (50 µg)	Q3S334	-0.0394187	0.0245945	0.00063415	0.00886574
BaP (50 µg)	K1Q831	-0.622772	4.64207	0.000622017	0.00886574
BaP (50 µg)	A0A210PRC7	0.359759	1.6731	0.000634133	0.00886574
BaP (50 µg)	A0A210Q4L8	0.53071	3.55007	0.000632254	0.00886574
BaP (50 µg)	A0A210R211	0.53071	3.55007	0.000632254	0.00886574
BaP (50 µg)	K1QVJ5	0.359759	1.6731	0.000623709	0.00886574
BaP (50 µg)	A0A210QQ60	0.554169	3.90279	0.000622592	0.00886574
BaP (50 µg)	K1PEH1	0.554169	3.90279	0.000648733	0.00901111
BaP (50 µg)	K1PRV2	0.53071	3.55007	0.00065479	0.00903694
BaP (50 µg)	K1QX29	0.506863	3.21126	0.000660986	0.00904437
BaP (50 µg)	A0A210PZL8	0.375619	1.72174	0.00066373	0.00904437
BaP (50 µg)	A0A210PXG6	-0.291503	1.07072	0.000689581	0.00914601
BaP (50 µg)	K1Q2H5	-0.422747	2.15078	0.000678058	0.00914601
BaP (50 µg)	K1RGT2	-0.493137	2.99816	0.000688752	0.00914601
BaP (50 µg)	A0A210QC96	0.30482	1.058	0.000695794	0.00914601
BaP (50 µg)	G0YEP8	0.804544	7.18426	0.000692615	0.00914601
BaP (50 µg)	K1QW87	0.532398	3.33649	0.000696677	0.00914601
BaP (50 µg)	A0A210PUY5	-0.260476	0.864264	0.000730553	0.00918702
BaP (50 µg)	A0A210Q422	-0.367606	1.82379	0.000719557	0.00918702
BaP (50 µg)	A0A210PYT3	0.395218	1.96096	0.000710694	0.00918702
BaP (50 µg)	A0A210QG45	0.58659	4.32448	0.00072624	0.00918702
BaP (50 µg)	A0A210R0C3	0.359759	1.6731	0.00071137	0.00918702
BaP (50 µg)	K1QCE8	0.545544	3.85464	0.000732614	0.00918702
BaP (50 µg)	K1Q8F0	0.568264	4.21581	0.000733937	0.00918702
BaP (50 µg)	K1R394	0.514517	3.46532	0.000714369	0.00918702
BaP (50 µg)	A0A210PIL4	0.344592	1.46455	0.000748173	0.0092405
BaP (50 µg)	K1RHA8	0.582151	4.05936	0.00075077	0.0092405
BaP (50 µg)	J7IAK1	0.375619	1.72174	0.000751086	0.0092405
BaP (50 µg)	A0A2T6N499	-0.274302	0.922027	0.000768753	0.00934882
BaP (50 µg)	A0A210PN39	0.572452	4.00503	0.000772917	0.00934882
BaP (50 µg)	K1QP84	0.616917	4.50467	0.000767833	0.00934882
BaP (50 µg)	K1PPU7	-0.553509	3.58081	0.000782248	0.00940883
BaP (50 µg)	A0A210R030	-0.364552	1.60511	0.000789922	0.00944835
BaP (50 µg)	A0A210PWS8	-0.364552	1.60511	0.000802287	0.00949079
BaP (50 µg)	K1RAC5	-0.367606	1.51983	0.000799436	0.00949079
BaP (50 µg)	K1QI33	0.602788	4.17508	0.000817916	0.00961561
BaP (50 µg)	G3ET31	0.359759	1.6731	0.00082177	0.00961561
BaP (50 µg)	A0A210R2T4	-0.527902	3.39423	0.000836122	0.00963319
BaP (50 µg)	K1Q688	0.318102	1.39436	0.00084117	0.00963319
BaP (50 µg)	A0A210QFR3	-0.455662	2.34659	0.000835881	0.00963319
BaP (50 µg)	A0A210Q2U9	0.375619	1.72174	0.0008405	0.00963319
BaP (50 µg)	K1PV91	0.375619	1.72174	0.000860955	0.0098076
BaP (50 µg)	K1Q8P4	0.568264	4.21581	0.000868986	0.00984699
BaP (50 µg)	A0A210R0E3	-0.357977	1.47241	0.000876237	0.00987716
BaP (50 µg)	K1R1P9	0.606399	4.44213	0.000881113	0.0098804
BaP (50 µg)	A0A210PIQ3	0.499001	3.17283	0.000887701	0.00990269
BaP (50 µg)	A0A210PZB5	-0.331386	1.34182	0.000897991	0.00991474
BaP (50 µg)	A0A210Q2G0	-0.331386	1.34182	0.000897991	0.00991474
BaP (100 µg)	A0A210PQ46	0.549257	3.99319	2.95e-07	0.000297839
BaP (100 µg)	A0A2T6N6F8	0.571977	4.09242	2.54e-07	0.000297839
BaP (100 µg)	K1QLH0	0.404867	2.06189	9.18e-07	0.000617987
BaP (100 µg)	K1QBF7	-0.328487	1.37532	1.42e-06	0.000716889
BaP (100 µg)	K1QTL2	-0.235378	0.729729	5.63e-06	0.00189606
BaP (100 µg)	K1RXD0	-0.235378	0.729729	5.63e-06	0.00189606
BaP (100 µg)	A0A210PQ87	0.622603	4.60724	8.28e-06	0.00239068
BaP (100 µg)	K1QU26	-0.184097	0.411261	1.54e-05	0.00328937
BaP (100 µg)	A0A0U3DK31	0.45462	2.64584	1.76e-05	0.00328937
BaP (100 µg)	K1PJ96	0.72084	7.00267	2.12e-05	0.00328937
BaP (100 µg)	K1PKG5	0.707955	6.28538	1.92e-05	0.00328937
BaP (100 µg)	K1QT31	0.741902	7.14828	2.09e-05	0.00328937
BaP (100 µg)	K1PB06	0.812291	7.98603	2.07e-05	0.00328937
BaP (100 µg)	A0A210QAQ1	0.156939	0.33709	3.49e-05	0.00413988
BaP (100 µg)	K1PNM8	-0.511855	3.08052	3.16e-05	0.00413988
BaP (100 µg)	A0A210QH19	0.156939	0.33709	3.49e-05	0.00413988
BaP (100 µg)	A0A210Q7D8	0.502714	3.29063	3.69e-05	0.00413988
BaP (100 µg)	K1P7X2	0.429958	2.34606	3.18e-05	0.00413988
BaP (100 µg)	A0A210R1U2	-0.132567	0.251454	5.82e-05	0.00452457
BaP (100 µg)	A0A141GE43	0.530398	3.39074	5.79e-05	0.00452457
BaP (100 µg)	A0A210QZL2	0.530398	3.39074	5.79e-05	0.00452457
BaP (100 µg)	D5FFY1	0.540268	3.69086	5.55e-05	0.00452457
BaP (100 µg)	K1PGN0	0.622603	4.60724	5.63e-05	0.00452457
BaP (100 µg)	K1RAJ1	0.540268	3.69086	5.55e-05	0.00452457
BaP (100 µg)	A0A210QL09	0.730125	6.42434	4.43e-05	0.00452457
BaP (100 µg)	K1QVF0	0.509241	3.31391	5.31e-05	0.00452457
BaP (100 µg)	A0A210PY04	0.628245	4.92431	7.88e-05	0.00497856
BaP (100 µg)	K1PXM3	0.540268	3.69086	7.58e-05	0.00497856
BaP (100 µg)	K1R394	0.54223	3.96291	7.89e-05	0.00497856
BaP (100 µg)	K1RA57	0.526173	3.63487	7.35e-05	0.00497856
BaP (100 µg)	A0A210PTI1	0.540268	3.69086	7.58e-05	0.00497856
BaP (100 µg)	K1QHJ9	0.564115	4.05787	7.73e-05	0.00497856
BaP (100 µg)	A0A210PDF0	0.44912	2.63089	8.24e-05	0.0050422
BaP (100 µg)	K1R8A0	0.588656	4.16637	8.5e-05	0.00504981
BaP (100 µg)	A0A210PVG4	0.466268	2.67817	8.97e-05	0.00516223
BaP (100 µg)	A0A2T6NH78	0.661412	5.39673	9.2e-05	0.00516223
BaP (100 µg)	A0A0C5PTA6	-0.428023	2.14715	0.000104504	0.00524903
BaP (100 µg)	K1QVN1	-0.38148	1.76271	0.000109673	0.00524903
BaP (100 µg)	J7IEQ6	0.435241	2.35837	0.000103166	0.00524903
BaP (100 µg)	K1R2P7	0.633378	5.24208	0.000114335	0.00524903
BaP (100 µg)	K1RSK2	0.502714	3.29063	0.000103869	0.00524903
BaP (100 µg)	A0A210PT83	0.580747	3.85578	0.000107219	0.00524903
BaP (100 µg)	A0A2T6NPC7	0.533088	3.66223	0.000112189	0.00524903
BaP (100 µg)	K1QFI9	0.466268	2.67817	0.000103802	0.00524903
BaP (100 µg)	A0A210PWG0	0.587574	4.43898	0.000121066	0.00537826
BaP (100 µg)	A0A2T6NEN2	0.484994	2.98023	0.000122475	0.00537826
BaP (100 µg)	K1PEH1	0.556547	4.02482	0.000127766	0.00549121
BaP (100 µg)	K1P7Y2	0.580151	4.12855	0.000135777	0.00559733
BaP (100 µg)	K1QAA9	0.555489	3.75221	0.000133162	0.00559733
BaP (100 µg)	K1QY32	0.299897	1.09019	0.000144938	0.00563153
BaP (100 µg)	A0A194AQ84	0.587574	4.43898	0.00014497	0.00563153
BaP (100 µg)	A0A210QR61	0.633378	5.24208	0.000142472	0.00563153
BaP (100 µg)	K1R3M1	0.472441	2.69565	0.000148763	0.00566983
BaP (100 µg)	A0A210PS67	-0.507876	3.18403	0.00022245	0.00576087
BaP (100 µg)	A0A210QAE0	-0.333386	1.32441	0.000188697	0.00576087
BaP (100 µg)	I6QQ41	0.100356	0.184891	0.000197607	0.00576087
BaP (100 µg)	A0A0K0PUP6	0.613318	4.56232	0.000166766	0.00576087
BaP (100 µg)	A0A0K0YB28	0.472967	2.94235	0.000198418	0.00576087
BaP (100 µg)	A0A194AKT3	0.37512	1.78804	0.000174907	0.00576087
BaP (100 µg)	A0A210PGZ2	0.564115	4.05787	0.000208041	0.00576087
BaP (100 µg)	A0A210PWU8	0.460332	2.66158	0.000172991	0.00576087
BaP (100 µg)	A0A210PXK9	0.379332	1.79377	0.000199245	0.00576087
BaP (100 µg)	A0A210QC28	0.446446	2.38519	0.000218824	0.00576087
BaP (100 µg)	A0A210QDC3	0.533088	3.66223	0.00017299	0.00576087
BaP (100 µg)	A0A210QJ15	0.512034	3.06825	0.000179939	0.00576087
BaP (100 µg)	A0A2T6N6V4	0.443821	2.6167	0.000155097	0.00576087
BaP (100 µg)	K1PFA6	0.556547	4.02482	0.000203082	0.00576087
BaP (100 µg)	K1PY29	0.556547	4.02482	0.00021642	0.00576087
BaP (100 µg)	K1Q8Y5	0.671513	5.45285	0.000221973	0.00576087
BaP (100 µg)	K1QE57	0.435241	2.35837	0.000165394	0.00576087
BaP (100 µg)	K1QFR6	0.429958	2.34606	0.000213276	0.00576087
BaP (100 µg)	K1QJB1	0.791655	7.15384	0.000189496	0.00576087
BaP (100 µg)	K1QWX7	0.491359	3.00061	0.00021428	0.00576087
BaP (100 µg)	A0A194AMH4	0.504863	3.04456	0.000174261	0.00576087
BaP (100 µg)	A0A1P8P0H8	0.460332	2.66158	0.000220059	0.00576087
BaP (100 µg)	A0A210PEL2	0.379332	1.79377	0.000199245	0.00576087
BaP (100 µg)	A0A210PR75	0.435241	2.35837	0.000165394	0.00576087
BaP (100 µg)	K1S0L8	0.429958	2.34606	0.000213276	0.00576087
BaP (100 µg)	K1QCC1	0.533088	3.66223	0.000226915	0.00580214
BaP (100 µg)	K1PV14	0.357238	1.54566	0.000234902	0.00593128
BaP (100 µg)	K1QR72	0.484994	2.98023	0.000239495	0.00597259
BaP (100 µg)	K1PUQ7	-0.090988	0.103814	0.00026204	0.00645514
BaP (100 µg)	K1QXD7	0.821755	8.40558	0.000267735	0.00651595
BaP (100 µg)	A0A210PEI7	-0.45187	2.41258	0.000281407	0.00676717
BaP (100 µg)	K1PJP1	-0.265752	0.920297	0.000294242	0.00683182
BaP (100 µg)	A0A210Q465	0.516021	3.33831	0.000289284	0.00683182
BaP (100 µg)	Q967M3	0.687454	6.15757	0.000292147	0.00683182
BaP (100 µg)	K1PTN1	0.0898253	0.124872	0.000303265	0.00688015
BaP (100 µg)	K1Q1Z1	0.682031	5.5115	0.000301483	0.00688015
BaP (100 µg)	K1Q5J8	0.502714	3.29063	0.000309948	0.00688015
BaP (100 µg)	A0A210QIB4	0.484994	2.98023	0.000309251	0.00688015
BaP (100 µg)	A0A210PRN1	-0.732878	5.93625	0.000323207	0.0068983
BaP (100 µg)	K1PXT4	0.357238	1.54566	0.000331255	0.0068983
BaP (100 µg)	K1QJR7	0.379332	1.79377	0.000330624	0.0068983
BaP (100 µg)	A0A210PFH8	0.379332	1.79377	0.000330624	0.0068983
BaP (100 µg)	A0A210PLM6	0.549257	3.99319	0.000330804	0.0068983
BaP (100 µg)	A0A210PP95	0.484994	2.98023	0.000321173	0.0068983
BaP (100 µg)	A0A210PXG6	-0.705557	5.29059	0.000334938	0.00690382
BaP (100 µg)	K1QAN9	-0.305404	1.17951	0.000339832	0.00693394
BaP (100 µg)	A0A210Q6H5	-0.360909	1.64132	0.00034852	0.00704011
BaP (100 µg)	A0A210QA16	0.357238	1.54566	0.000375792	0.00725738
BaP (100 µg)	A0A210QYI2	0.571977	4.09242	0.00037724	0.00725738
BaP (100 µg)	K1RDI4	0.409706	2.07102	0.000373203	0.00725738
BaP (100 µg)	K1Q8Q6	0.409706	2.07102	0.000373203	0.00725738
BaP (100 µg)	A0A2T6N4Q9	-0.305404	1.17951	0.000399582	0.00729165
BaP (100 µg)	A0A210PJV4	0.484994	2.98023	0.00040068	0.00729165
BaP (100 µg)	K1PV91	0.38371	1.79996	0.00039352	0.00729165
BaP (100 µg)	K1Q326	0.619283	4.8781	0.000386884	0.00729165
BaP (100 µg)	K1R6Z7	0.549257	3.99319	0.000398931	0.00729165
BaP (100 µg)	K1RH42	0.431114	2.11386	0.000393723	0.00729165
BaP (100 µg)	A0A2T6NS15	0.0829389	0.0965461	0.000412331	0.00743668
BaP (100 µg)	A0A210Q783	0.595824	4.4783	0.00042667	0.0075603
BaP (100 µg)	K1QCG0	0.619283	4.8781	0.000424971	0.0075603
BaP (100 µg)	K1QC64	0.647265	5.023	0.000433807	0.00761991
BaP (100 µg)	A0A210Q898	-0.323686	1.27397	0.000455865	0.0078705
BaP (100 µg)	A0A210PV79	0.297117	1.09129	0.000455431	0.0078705
BaP (100 µg)	K1PSR4	0.571977	4.09242	0.000459907	0.00787299
BaP (100 µg)	K1QKB9	0.651704	5.34298	0.000472807	0.00802581
BaP (100 µg)	A0A0M4TZ63	-0.580026	4.04864	0.00050728	0.00826733
BaP (100 µg)	A0A210PE39	0.078937	0.0829639	0.000498598	0.00826733
BaP (100 µg)	K1PNH0	0.305803	1.08858	0.000515685	0.00826733
BaP (100 µg)	K1QX98	0.414737	2.08073	0.00049712	0.00826733
BaP (100 µg)	K1R773	0.424873	2.33442	0.000512667	0.00826733
BaP (100 µg)	K1RWI1	0.526173	3.63487	0.000510662	0.00826733
BaP (100 µg)	K1PSB2	0.753584	6.90071	0.00050732	0.00826733
BaP (100 µg)	A0A210QN77	-0.337825	1.42682	0.000528241	0.00837874
BaP (100 µg)	A0A210QID0	0.613318	4.56232	0.00053093	0.00837874
BaP (100 µg)	A0A210QXI1	0.460332	2.66158	0.000539717	0.00845138
BaP (100 µg)	A0A210PRA5	-0.603873	4.08387	0.000553482	0.00850842
BaP (100 µg)	K1QFX2	-0.475329	2.69099	0.000572844	0.00850842
BaP (100 µg)	A0A210QEN6	0.299897	1.09019	0.00057231	0.00850842
BaP (100 µg)	J9Q405	0.651704	5.34298	0.00056891	0.00850842
BaP (100 µg)	K1QW73	0.400211	2.05334	0.000553789	0.00850842
BaP (100 µg)	K1R5S8	0.547729	3.72082	0.000557213	0.00850842
BaP (100 µg)	K1Q8B1	0.45462	2.64584	0.000570735	0.00850842
BaP (100 µg)	K1Q2Y2	0.540268	3.69086	0.000611484	0.00869858
BaP (100 µg)	K1QVN9	0.497976	3.02203	0.000606504	0.00869858
BaP (100 µg)	Q25458	0.395726	2.04531	0.000607106	0.00869858
BaP (100 µg)	A0A210PFF1	0.397948	1.82156	0.000601764	0.00869858
BaP (100 µg)	A0A210PUC2	0.496426	3.26841	0.000610002	0.00869858
BaP (100 µg)	K1R3G7	0.667901	5.13094	0.000600122	0.00869858
BaP (100 µg)	A0A210R613	0.684871	5.83445	0.000625452	0.00883506
BaP (100 µg)	A0A210PZX4	0.547729	3.72082	0.000641704	0.00899601
BaP (100 µg)	A0A210Q671	0.628245	4.92431	0.000645753	0.00899601
BaP (100 µg)	Q08G56	0.409706	2.07102	0.000650305	0.00899737
BaP (100 µg)	J7IAK1	0.516021	3.33831	0.000662693	0.00910639
BaP (100 µg)	A0A210QJ71	-0.414967	1.85852	0.000692174	0.00932272
BaP (100 µg)	K1PXS8	0.540268	3.69086	0.000698358	0.00932272
BaP (100 µg)	A0A2T6MZG5	0.674788	5.77504	0.00069575	0.00932272
BaP (100 µg)	A0A2T6N7T8	0.330271	1.3086	0.000690367	0.00932272
BaP (100 µg)	K1S3J4	0.564115	4.05787	0.000701511	0.00932272
BaP (100 µg)	K1PQJ3	-0.23385	0.67492	0.000708287	0.00935124
BaP (100 µg)	A0A210R0W2	0.502714	3.29063	0.000726899	0.00947313
BaP (100 µg)	A0A2U0AFQ1	0.602351	4.79139	0.000723472	0.00947313
BaP (100 µg)	A0A210QSN1	0.497976	3.02203	0.000741381	0.00953879
BaP (100 µg)	A0A210QVP2	0.545982	3.44851	0.000737695	0.00953879
BaP (100 µg)	K1Q039	0.563565	3.7851	0.000761316	0.00973328
BaP (100 µg)	P91958	0.135878	0.303617	0.000772275	0.00974997
BaP (100 µg)	Q3S892	0.135878	0.303617	0.000772275	0.00974997
BaP (100 µg)	K1QZ49	0.571977	4.09242	0.000782079	0.00981241
BaP (100 µg)	K1QQW7	0.523067	3.36389	0.0007874	0.0098182
BaP (100 µg)	A0A210PNE6	-0.428023	2.25451	0.000805282	0.00992619
BaP (100 µg)	A0A2T6NDW9	0.642366	5.29147	0.000805889	0.00992619
BaP (100 µg)	K1QLU6	0.0694766	0.0573128	0.000812355	0.00994519
BaP (5 µg) & C60 (1 mg)	A0A210PRH0	-0.948368	8.91695	9.45e-05	0.0066844
BaP (5 µg) & C60 (1 mg)	A0A210PWB0	-0.493405	2.88088	0.000324551	0.00914973
BaP (5 µg) & C60 (1 mg)	A0A210Q1B3	-0.362242	1.52338	0.000344873	0.00927478
BaP (5 µg) & C60 (1 mg)	A0A210Q5I6	-0.538493	3.4843	0.000417163	0.00930732
BaP (5 µg) & C60 (1 mg)	A0A210Q6Q3	-0.485053	2.34919	0.000163426	0.0070134
BaP (5 µg) & C60 (1 mg)	A0A210QD64	-0.689052	6.15785	0.000128019	0.0066844
BaP (5 µg) & C60 (1 mg)	A0A210QF19	-0.530879	3.29113	0.000430757	0.00930962
BaP (5 µg) & C60 (1 mg)	A0A210QJH6	-0.514245	2.90914	0.000103739	0.0066844
BaP (5 µg) & C60 (1 mg)	A0A210QL17	-0.234486	0.611296	0.000142503	0.0066844
BaP (5 µg) & C60 (1 mg)	A0A210R4U6	-0.350866	1.45929	0.000279168	0.00906884
BaP (5 µg) & C60 (1 mg)	A0A2T6NAC5	0.154079	0.370232	5.12e-06	0.00224209
BaP (5 µg) & C60 (1 mg)	A0A2T6NM27	-0.339947	1.39811	0.000338638	0.00923018
BaP (5 µg) & C60 (1 mg)	K1PVZ3	-0.386489	1.83588	2.07e-05	0.00464982
BaP (5 µg) & C60 (1 mg)	K1Q117	-0.530879	3.29113	4.62e-05	0.0053733
BaP (5 µg) & C60 (1 mg)	K1Q862	0.146943	0.290079	5.33e-05	0.0053733
BaP (5 µg) & C60 (1 mg)	K1QP76	0.37131	1.93519	0.000309809	0.00906884
BaP (5 µg) & C60 (1 mg)	K1QRC8	-0.538493	3.4843	0.000417163	0.00930732
BaP (5 µg) & C60 (1 mg)	K1QS59	-0.39763	1.99703	0.000116308	0.0066844
BaP (5 µg) & C60 (1 mg)	K1RE88	-0.602981	4.0074	0.000162255	0.0070134
BaP (5 µg) & C60 (1 mg)	K4GX76	0.198473	0.53896	0.000420382	0.00930732
BaP (5 µg) & C60 (1 mg)	Q6PTH6	0.271229	1.05095	0.000393596	0.00930732
BaP (5 µg) & C60 (1 mg)	A0A210Q1F5	-0.282153	0.966953	3.68e-05	0.0053733
BaP (5 µg) & C60 (1 mg)	A0A2T6NT62	-0.716638	5.88297	0.000202985	0.00772492
BaP (5 µg) & C60 (1 mg)	K1Q831	-0.309674	1.23038	0.000463781	0.00984681
BaP (5 µg) & C60 (1 mg)	K1QYA5	-0.579135	3.66692	6.09e-05	0.00584552
BaP (5 µg) & C60 (1 mg)	A0A077GY59	0.526527	3.5134	0.000138559	0.0066844
BaP (5 µg) & C60 (1 mg)	A0A210PIS2	0.507801	3.17724	0.0001236	0.0066844
BaP (5 µg) & C60 (1 mg)	A0A210PPH1	0.416653	2.20605	0.000247913	0.00869922
BaP (5 µg) & C60 (1 mg)	A0A210PQN8	0.493929	2.86121	0.000150455	0.00681702
BaP (5 µg) & C60 (1 mg)	A0A210PS83	0.597022	4.33587	0.000292963	0.00906884
BaP (5 µg) & C60 (1 mg)	A0A210PUA9	0.391118	1.92642	0.000379666	0.00930732
BaP (5 µg) & C60 (1 mg)	A0A210PVB2	0.441744	2.50191	0.000102796	0.0066844
BaP (5 µg) & C60 (1 mg)	A0A210PVD9	0.629107	5.09085	0.000280158	0.00906884
BaP (5 µg) & C60 (1 mg)	A0A210PXN9	0.420865	2.20824	4.94e-05	0.0053733
BaP (5 µg) & C60 (1 mg)	A0A210Q217	0.368398	1.6608	4.12e-05	0.0053733
BaP (5 µg) & C60 (1 mg)	A0A210Q2R1	0.597022	4.33587	0.000287688	0.00906884
BaP (5 µg) & C60 (1 mg)	A0A210Q2R2	0.589263	4.30803	1.99e-05	0.00464982
BaP (5 µg) & C60 (1 mg)	A0A210Q465	0.613511	4.71018	0.000363962	0.00930732
BaP (5 µg) & C60 (1 mg)	A0A210Q758	0.688799	5.69126	0.000326614	0.00914973
BaP (5 µg) & C60 (1 mg)	A0A210QC28	0.402832	1.9264	0.000424528	0.00930732
BaP (5 µg) & C60 (1 mg)	A0A210QGR4	0.429799	2.21402	0.000243167	0.00869922
BaP (5 µg) & C60 (1 mg)	A0A210QHI7	0.402832	1.9264	0.000424528	0.00930732
BaP (5 µg) & C60 (1 mg)	A0A210QL09	0.471492	2.82165	0.000303447	0.00906884
BaP (5 µg) & C60 (1 mg)	A0A210QLD0	0.476774	2.83042	0.000176026	0.0072458
BaP (5 µg) & C60 (1 mg)	A0A210QN44	0.53951	3.54812	1.01e-05	0.00292028
BaP (5 µg) & C60 (1 mg)	A0A210QNU3	0.557554	3.89849	0.000475374	0.00988484
BaP (5 µg) & C60 (1 mg)	A0A210QQB8	0.702946	6.09909	0.00013968	0.0066844
BaP (5 µg) & C60 (1 mg)	A0A210QTA7	0.526527	3.5134	0.000138559	0.0066844
BaP (5 µg) & C60 (1 mg)	A0A210QVM4	0.697279	6.40695	0.000182363	0.00735653
BaP (5 µg) & C60 (1 mg)	A0A210QY75	0.500129	2.87313	0.000224451	0.00838367
BaP (5 µg) & C60 (1 mg)	A0A210R1A7	0.581802	4.2816	7.09e-05	0.00649609
BaP (5 µg) & C60 (1 mg)	A0A210R234	0.532892	3.53024	0.000392358	0.00930732
BaP (5 µg) & C60 (1 mg)	A0A2T6MWI3	0.553568	3.58725	0.000392384	0.00930732
BaP (5 µg) & C60 (1 mg)	A0A2T6MWW0	0.31395	1.1831	5.56e-06	0.00224209
BaP (5 µg) & C60 (1 mg)	A0A2T6NFY5	0.476774	2.83042	0.000176026	0.0072458
BaP (5 µg) & C60 (1 mg)	G8XUN4	0.557554	3.89849	0.000475374	0.00988484
BaP (5 µg) & C60 (1 mg)	K1P8S5	0.420865	2.20824	4.94e-05	0.0053733
BaP (5 µg) & C60 (1 mg)	K1PE89	0.571931	3.94384	8.26e-05	0.0066844
BaP (5 µg) & C60 (1 mg)	K1PI41	0.544248	3.8579	0.000135563	0.0066844
BaP (5 µg) & C60 (1 mg)	K1PKC9	0.48798	2.85016	5.5e-07	0.00055494
BaP (5 µg) & C60 (1 mg)	K1PTA3	0.660816	5.55699	2.63e-05	0.00531375
BaP (5 µg) & C60 (1 mg)	K1PUC3	0.621684	4.74277	0.00010466	0.0066844
BaP (5 µg) & C60 (1 mg)	K1PUP6	0.53951	3.54812	1.01e-05	0.00292028
BaP (5 µg) & C60 (1 mg)	K1PXS8	0.507801	3.17724	0.0001236	0.0066844
BaP (5 µg) & C60 (1 mg)	K1PXT6	0.613511	4.71018	0.000414538	0.00930732
BaP (5 µg) & C60 (1 mg)	K1PZL1	0.631432	4.46328	7.55e-05	0.00662307
BaP (5 µg) & C60 (1 mg)	K1Q639	0.344324	1.40853	0.000419926	0.00930732
BaP (5 µg) & C60 (1 mg)	K1Q754	0.476774	2.83042	0.000187281	0.00740679
BaP (5 µg) & C60 (1 mg)	K1QAR9	0.398772	1.92603	0.000385959	0.00930732
BaP (5 µg) & C60 (1 mg)	K1QBE0	0.613511	4.71018	0.000336446	0.00923018
BaP (5 µg) & C60 (1 mg)	K1QDB9	0.645932	5.16416	5e-05	0.0053733
BaP (5 µg) & C60 (1 mg)	K1QR62	0.605648	4.67918	0.000247501	0.00869922
BaP (5 µg) & C60 (1 mg)	K1QT31	0.761409	7.47559	0.000314734	0.00906884
BaP (5 µg) & C60 (1 mg)	K1QT35	0.456271	2.51868	0.000119006	0.0066844
BaP (5 µg) & C60 (1 mg)	K1QXX7	0.40706	1.92718	2.09e-06	0.00140621
BaP (5 µg) & C60 (1 mg)	K1R9F6	0.579563	3.96848	0.000136426	0.0066844
BaP (5 µg) & C60 (1 mg)	K1RFT6	0.471492	2.82165	0.000303447	0.00906884
BaP (5 µg) & C60 (1 mg)	K1RLC5	0.451239	2.51251	0.000289787	0.00906884
BaP (5 µg) & C60 (1 mg)	K1RNQ9	0.526527	3.5134	0.000115373	0.0066844
BaP (5 µg) & C60 (1 mg)	Q5K6R2	0.574622	4.25652	0.000250151	0.00869922
BaP (5 µg) & C60 (1 mg)	Q6PTL0	0.341431	1.41298	0.000129303	0.0066844
BaP (5 µg) & C60 (1 mg)	Q7Z0P7	0.532892	3.53024	0.000433864	0.00930962
BaP (5 µg) & C60 (1 mg)	A0A210QY46	0.688799	5.69126	0.000366287	0.00930732
BaP (5 µg) & C60 (1 mg)	A0A210R613	0.669779	5.59965	3.03e-05	0.0053733
BaP (5 µg) & C60 (1 mg)	A0A2T6N881	0.621684	4.74277	0.000140014	0.0066844
BaP (5 µg) & C60 (1 mg)	A0A2T9ZXF7	0.344324	1.40853	0.000419926	0.00930732
BaP (5 µg) & C60 (1 mg)	H9LJA2	0.564601	3.92054	1.6e-07	0.000323678
BaP (5 µg) & C60 (1 mg)	K1PSP0	0.368398	1.6608	0.000312906	0.00906884
BaP (5 µg) & C60 (1 mg)	K1QBX6	0.43454	2.21767	5.3e-05	0.0053733
BaP (5 µg) & C60 (1 mg)	K1QFA5	0.341431	1.41298	0.000202331	0.00772492
BaP (5 µg) & C60 (1 mg)	K1QJC3	0.557554	3.89849	0.00015209	0.00681702
BaP (5 µg) & C60 (1 mg)	K1QMW0	0.574622	4.25652	4.26e-05	0.0053733
BaP (5 µg) & C60 (1 mg)	K1QXD7	0.629107	5.09085	8.84e-05	0.0066844
BaP (5 µg) & C60 (1 mg)	K1R1E7	0.476774	2.83042	0.0003616	0.00930732
BaP (5 µg) & C60 (1 mg)	K1R1Q8	0.198473	0.453861	0.000420382	0.00930732
BaP (50 µg) & C60 (1 mg)	A0A077H0N2	-0.408739	2.25674	3.06e-08	2.76e-05
BaP (50 µg) & C60 (1 mg)	A0A0C5PTA6	-0.332636	1.39526	0.000413429	0.0093049
BaP (50 µg) & C60 (1 mg)	A0A210PGX7	-0.729994	6.5336	0.000316151	0.00878079
BaP (50 µg) & C60 (1 mg)	A0A210PP67	-0.295082	1.13101	0.000186351	0.00830039
BaP (50 µg) & C60 (1 mg)	A0A210PRW8	-0.444072	2.47171	0.000313525	0.00878079
BaP (50 µg) & C60 (1 mg)	A0A210PZQ9	-0.41165	2.1481	6.82e-05	0.0070501
BaP (50 µg) & C60 (1 mg)	A0A210Q182	-0.489876	3.05575	0.000231126	0.00830039
BaP (50 µg) & C60 (1 mg)	A0A210Q5I6	-0.579358	4.20758	1.57e-05	0.00329693
BaP (50 µg) & C60 (1 mg)	A0A210Q6A2	-0.318541	1.32869	0.000175837	0.00830039
BaP (50 µg) & C60 (1 mg)	A0A210Q6V8	-0.477239	2.8219	0.000280221	0.00864835
BaP (50 µg) & C60 (1 mg)	A0A210Q9W0	-0.434734	2.4149	2.42e-08	2.76e-05
BaP (50 µg) & C60 (1 mg)	A0A210QBU9	-0.512243	3.36703	0.000192934	0.00830039
BaP (50 µg) & C60 (1 mg)	A0A210QE06	-0.290344	1.02487	1.16e-07	3.81e-05
BaP (50 µg) & C60 (1 mg)	A0A210QIJ3	-0.733579	6.09792	8.56e-06	0.00197763
BaP (50 µg) & C60 (1 mg)	A0A210QN77	-0.444072	2.47171	0.00029366	0.00878079
BaP (50 µg) & C60 (1 mg)	A0A210QVL9	0.435983	2.55898	0.000277191	0.00864835
BaP (50 µg) & C60 (1 mg)	A0A210QVV1	-0.827317	8.23335	3.81e-05	0.0067617
BaP (50 µg) & C60 (1 mg)	A0A210QY73	-0.301609	1.15959	0.000414677	0.0093049
BaP (50 µg) & C60 (1 mg)	A0A210R016	0.0506928	0.0370375	0.000109418	0.00743077
BaP (50 µg) & C60 (1 mg)	A0A210R1X3	-0.295082	1.13101	0.000186351	0.00830039
BaP (50 µg) & C60 (1 mg)	A0A210R250	-0.371998	1.8073	0.000191841	0.00830039
BaP (50 µg) & C60 (1 mg)	A0A2T6MWD0	-0.508735	2.86473	0.000350554	0.00899367
BaP (50 µg) & C60 (1 mg)	A0A2T6NEC0	-0.41165	2.1481	6.62e-05	0.0070501
BaP (50 µg) & C60 (1 mg)	K1PFN2	-0.627379	4.7775	0.000126369	0.00830039
BaP (50 µg) & C60 (1 mg)	K1PHG5	-0.474398	2.65612	0.000306107	0.00878079
BaP (50 µg) & C60 (1 mg)	K1PWQ5	-0.45378	2.53075	0.000303401	0.00878079
BaP (50 µg) & C60 (1 mg)	K1Q0L6	0.0506928	0.0351856	0.000109418	0.00743077
BaP (50 µg) & C60 (1 mg)	K1Q117	-0.371998	1.8073	0.000174328	0.00830039
BaP (50 µg) & C60 (1 mg)	K1Q2U2	-0.591755	4.30342	9.51e-05	0.00743077
BaP (50 µg) & C60 (1 mg)	K1Q9D7	-0.322766	1.2523	0.000409064	0.0093049
BaP (50 µg) & C60 (1 mg)	K1QDH5	-0.53427	3.69074	7.02e-05	0.0070501
BaP (50 µg) & C60 (1 mg)	K1QKH9	-0.311877	1.29723	0.000280912	0.00864835
BaP (50 µg) & C60 (1 mg)	K1QNI8	-0.591755	4.30342	0.000134357	0.00830039
BaP (50 µg) & C60 (1 mg)	K1QRV0	-0.686273	5.25045	0.00037041	0.00913492
BaP (50 µg) & C60 (1 mg)	K1R281	-0.559361	3.52422	0.000223481	0.00830039
BaP (50 µg) & C60 (1 mg)	K1RYZ3	-0.448113	2.63497	0.000224126	0.00830039
BaP (50 µg) & C60 (1 mg)	A0A194AMN0	-0.570796	3.78123	0.000314278	0.00878079
BaP (50 µg) & C60 (1 mg)	A0A210QJC2	0.0506928	0.0370375	0.000109418	0.00743077
BaP (50 µg) & C60 (1 mg)	A0A210QLR1	-0.53427	3.52298	0.000329048	0.00878079
BaP (50 µg) & C60 (1 mg)	A0A210QST8	0.0506928	0.0370375	0.000109418	0.00743077
BaP (50 µg) & C60 (1 mg)	A0A2T6N4Q9	-0.477239	2.8219	0.000350301	0.00899367
BaP (50 µg) & C60 (1 mg)	A0A2T6NV13	-0.295082	1.13101	0.000380937	0.00916234
BaP (50 µg) & C60 (1 mg)	K1QDW5	-0.510022	3.03213	0.000262366	0.00853245
BaP (50 µg) & C60 (1 mg)	K1QHY6	-0.498646	2.9592	9.55e-05	0.00743077
BaP (50 µg) & C60 (1 mg)	K1QT67	-0.386713	2.0048	0.000137375	0.00830039
BaP (50 µg) & C60 (1 mg)	K1QYA5	-0.332636	1.39526	0.000413429	0.0093049
BaP (50 µg) & C60 (1 mg)	K1R0M5	-0.444072	2.47171	0.000370187	0.00913492
BaP (50 µg) & C60 (1 mg)	K1RVI0	-0.456267	2.263	0.000174233	0.00830039
BaP (50 µg) & C60 (1 mg)	A0A0C5Q436	0.426841	2.34519	0.00037233	0.00913492
BaP (50 µg) & C60 (1 mg)	A0A1B1M0V0	0.366195	1.61809	0.000166641	0.00830039
BaP (50 µg) & C60 (1 mg)	A0A210PFQ1	0.385112	1.84145	0.000449759	0.00970554
BaP (50 µg) & C60 (1 mg)	A0A210PL62	0.402994	2.07316	0.000215109	0.00830039
BaP (50 µg) & C60 (1 mg)	A0A210PM87	0.366195	1.61809	0.000148418	0.00830039
BaP (50 µg) & C60 (1 mg)	A0A210PN37	0.323711	1.32889	0.000271433	0.00864835
BaP (50 µg) & C60 (1 mg)	A0A210PVE0	0.498152	3.06564	6.88e-05	0.0070501
BaP (50 µg) & C60 (1 mg)	A0A210PYN3	0.360021	1.5953	0.000324321	0.00878079
BaP (50 µg) & C60 (1 mg)	A0A210Q2U2	0.220618	0.595452	3.01e-07	8.68e-05
BaP (50 µg) & C60 (1 mg)	A0A210Q465	0.756962	6.69078	5.3e-05	0.0070501
BaP (50 µg) & C60 (1 mg)	A0A210Q8E1	0.348373	1.55238	0.000162976	0.00830039
BaP (50 µg) & C60 (1 mg)	A0A210Q8G1	0.473904	2.75111	0.000400751	0.0093049
BaP (50 µg) & C60 (1 mg)	A0A210QCU2	0.787658	6.93705	0.000208916	0.00830039
BaP (50 µg) & C60 (1 mg)	A0A210QGH5	0.4503	2.63149	0.000256006	0.00853245
BaP (50 µg) & C60 (1 mg)	A0A210QI96	0.682961	5.5871	9.87e-05	0.00743077
BaP (50 µg) & C60 (1 mg)	A0A210QIS2	0.44301	2.59456	0.000463075	0.00990037
BaP (50 µg) & C60 (1 mg)	A0A210QUG9	0.396468	2.04459	6.99e-05	0.0070501
BaP (50 µg) & C60 (1 mg)	A0A210QW28	0.441483	2.41437	9.74e-05	0.00743077
BaP (50 µg) & C60 (1 mg)	A0A210QY06	0.604628	5.00662	2.31e-05	0.00444738
BaP (50 µg) & C60 (1 mg)	A0A210R2E7	0.434021	2.37911	8.51e-05	0.00743077
BaP (50 µg) & C60 (1 mg)	A0A2T6N8P7	0.379315	1.66656	0.000200344	0.00830039
BaP (50 µg) & C60 (1 mg)	A0A2T6NM75	0.545457	3.73666	0.000212833	0.00830039
BaP (50 µg) & C60 (1 mg)	B6ZCB0	0.348373	1.55238	0.00023243	0.00830039
BaP (50 µg) & C60 (1 mg)	J9Q385	0.473384	2.9317	0.000108877	0.00743077
BaP (50 µg) & C60 (1 mg)	K1PH74	0.366195	1.61809	0.000233662	0.00830039
BaP (50 µg) & C60 (1 mg)	K1PLC5	0.426841	2.34519	0.00037233	0.00913492
BaP (50 µg) & C60 (1 mg)	K1PQG2	0.496104	3.24548	0.000202098	0.00830039
BaP (50 µg) & C60 (1 mg)	K1PT30	0.4503	2.63149	0.000239041	0.00836282
BaP (50 µg) & C60 (1 mg)	K1PY54	0.575784	3.92107	0.000142415	0.00830039
BaP (50 µg) & C60 (1 mg)	K1Q0G7	0.402994	2.07316	0.000215109	0.00830039
BaP (50 µg) & C60 (1 mg)	K1Q5U7	0.635655	4.52268	6.59e-05	0.0070501
BaP (50 µg) & C60 (1 mg)	K1QFY7	0.426841	2.34519	0.000396253	0.0093049
BaP (50 µg) & C60 (1 mg)	K1QG87	0.402994	2.07316	0.000215109	0.00830039
BaP (50 µg) & C60 (1 mg)	K1QJN4	0.384116	1.99056	0.000210817	0.00830039
BaP (50 µg) & C60 (1 mg)	K1QSP5	0.342874	1.53214	0.00017451	0.00830039
BaP (50 µg) & C60 (1 mg)	K1QT31	0.646302	5.55733	8.44e-06	0.00197763
BaP (50 µg) & C60 (1 mg)	K1QXE2	0.541679	3.09473	0.000375841	0.00913492
BaP (50 µg) & C60 (1 mg)	K1R6F3	0.323711	1.32889	0.000183251	0.00830039
BaP (50 µg) & C60 (1 mg)	K1RDQ4	0.545457	3.73666	0.000175416	0.00830039
BaP (50 µg) & C60 (1 mg)	K1RGF4	0.565266	3.85712	0.000415073	0.0093049
BaP (50 µg) & C60 (1 mg)	A0A194AJ25	0.441483	2.41437	6.81e-05	0.0070501
BaP (50 µg) & C60 (1 mg)	A0A210PDI2	0.728765	6.4641	4.19e-05	0.00690765
BaP (50 µg) & C60 (1 mg)	A0A210PMT9	0.29862	1.12102	8.82e-08	3.81e-05
BaP (50 µg) & C60 (1 mg)	A0A210QA47	0.360021	1.5953	0.000318543	0.00878079
BaP (50 µg) & C60 (1 mg)	A0A210QAC7	0.4503	2.63149	0.000341145	0.00895118
BaP (50 µg) & C60 (1 mg)	A0A210QGX6	0.396468	2.04459	6.99e-05	0.0070501
BaP (50 µg) & C60 (1 mg)	A0A210R3Y9	0.379315	1.66656	0.000329567	0.00878079
BaP (50 µg) & C60 (1 mg)	A0A2T6N4Y9	0.568541	4.09243	0.000427184	0.0094843
BaP (50 µg) & C60 (1 mg)	K1PUN9	0.385112	1.84145	0.000449759	0.00970554
BaP (50 µg) & C60 (1 mg)	K1PY16	0.589113	4.22441	0.000330849	0.00878079
BaP (50 µg) & C60 (1 mg)	K1Q8T3	0.696028	5.68371	0.000445914	0.00970554
BaP (50 µg) & C60 (1 mg)	K1Q9V3	0.473384	2.9317	0.000108877	0.00743077
BaP (50 µg) & C60 (1 mg)	K1QA95	0.29862	1.12102	8.82e-08	3.81e-05
BaP (50 µg) & C60 (1 mg)	K1QAB3	0.724465	6.69739	0.000219618	0.00830039
BaP (50 µg) & C60 (1 mg)	K1QBD4	0.372621	1.79107	3.58e-08	2.76e-05
BaP (50 µg) & C60 (1 mg)	K1QDK1	0.507071	3.11388	0.000257989	0.00853245
BaP (50 µg) & C60 (1 mg)	K1QRZ0	0.473904	2.75111	0.000262085	0.00853245
BaP (50 µg) & C60 (1 mg)	K1R2V1	0.360021	1.5953	0.000318543	0.00878079
BaP (50 µg) & C60 (1 mg)	K1RBD1	0.285158	1.08103	1.06e-07	3.81e-05
BaP (50 µg) & C60 (1 mg)	K1S1E2	0.4503	2.63149	0.000256006	0.00853245
BaP (100 µg) & C60 (1 mg)	A0A0C5PTA6	-0.384094	1.8619	0.000103341	0.00737502
BaP (100 µg) & C60 (1 mg)	A0A0K0YAY4	-0.432481	2.24395	0.000347173	0.00971305
BaP (100 µg) & C60 (1 mg)	A0A210PNT2	-0.369999	1.79409	0.000121514	0.00737502
BaP (100 µg) & C60 (1 mg)	A0A210PSE3	-0.610818	4.20795	0.000217729	0.00838021
BaP (100 µg) & C60 (1 mg)	A0A210PXW6	-0.444372	2.76606	0.000167499	0.00838021
BaP (100 µg) & C60 (1 mg)	A0A210Q6H5	-0.393082	2.0412	2.95e-07	0.000124733
BaP (100 µg) & C60 (1 mg)	A0A210Q6I4	-0.369999	1.79409	0.000121514	0.00737502
BaP (100 µg) & C60 (1 mg)	A0A210QBU9	-0.468544	2.91499	0.000280963	0.00881449
BaP (100 µg) & C60 (1 mg)	A0A210QK21	-0.369999	1.79409	0.000201342	0.00838021
BaP (100 µg) & C60 (1 mg)	A0A210QLG6	-0.457143	2.52869	0.000355212	0.00971955
BaP (100 µg) & C60 (1 mg)	A0A210QYH2	-0.477203	2.96829	0.000167861	0.00838021
BaP (100 µg) & C60 (1 mg)	A0A210R0I7	-0.423456	2.34404	0.000219805	0.00838021
BaP (100 µg) & C60 (1 mg)	A0A210R0P2	-0.415802	2.30204	8.15e-05	0.00737502
BaP (100 µg) & C60 (1 mg)	A0A2T6MYR6	-0.415802	2.15817	2.35e-07	0.000124733
BaP (100 µg) & C60 (1 mg)	A0A2T6NAX7	-0.423976	2.20021	0.000313292	0.00907091
BaP (100 µg) & C60 (1 mg)	A0A2T6NCC5	0.0732357	0.0753491	0.000263448	0.00874646
BaP (100 µg) & C60 (1 mg)	A0A2T6NDA6	-0.652842	5.39085	0.000342109	0.00969296
BaP (100 µg) & C60 (1 mg)	K1PFN2	-0.477203	2.96829	0.000305678	0.00906117
BaP (100 µg) & C60 (1 mg)	K1PG82	-0.563701	4.08242	0.000113091	0.00737502
BaP (100 µg) & C60 (1 mg)	K1PNL2	-0.448224	2.47983	0.000106512	0.00737502
BaP (100 µg) & C60 (1 mg)	K1Q6C9	-0.649293	4.69181	0.000152399	0.00824943
BaP (100 µg) & C60 (1 mg)	K1Q862	-0.0787674	0.0826894	0.000189904	0.00838021
BaP (100 µg) & C60 (1 mg)	K1QCE9	-0.501194	2.94273	0.000213505	0.00838021
BaP (100 µg) & C60 (1 mg)	K1QCK9	-0.384094	1.8619	0.000303182	0.00906117
BaP (100 µg) & C60 (1 mg)	K1QDH5	-0.687607	5.90872	2.22e-05	0.00393995
BaP (100 µg) & C60 (1 mg)	K1QJE3	-0.598666	3.91927	0.000136793	0.00774124
BaP (100 µg) & C60 (1 mg)	K1QMB9	-0.55178	3.80691	8.26e-05	0.00737502
BaP (100 µg) & C60 (1 mg)	K1QNI8	-0.446176	2.6229	0.000271131	0.00879079
BaP (100 µg) & C60 (1 mg)	K1QRC8	-0.499571	3.2784	0.000183265	0.00838021
BaP (100 µg) & C60 (1 mg)	K1QS59	-0.563701	4.08242	8.46e-05	0.00737502
BaP (100 µg) & C60 (1 mg)	K1QXG2	-0.457143	2.52869	0.000210579	0.00838021
BaP (100 µg) & C60 (1 mg)	K1QZM8	-0.248692	0.777155	1.9e-06	0.000427773
BaP (100 µg) & C60 (1 mg)	K1RI95	-0.541333	3.73578	0.000111035	0.00737502
BaP (100 µg) & C60 (1 mg)	K1RIS8	-0.49057	3.22	5.56e-05	0.00737502
BaP (100 µg) & C60 (1 mg)	A0A210PWS8	-0.423976	2.20021	0.000352512	0.00971955
BaP (100 µg) & C60 (1 mg)	A0A210QJ60	-0.457143	2.52869	0.000210579	0.00838021
BaP (100 µg) & C60 (1 mg)	A0A2T6N4Q9	-0.597409	4.32286	0.000210797	0.00838021
BaP (100 µg) & C60 (1 mg)	A0A2T6NS57	-0.585727	4.44149	0.000368104	0.0098557
BaP (100 µg) & C60 (1 mg)	K1PEY7	-0.384094	1.8619	0.000303182	0.00906117
BaP (100 µg) & C60 (1 mg)	K1QYA5	-0.322693	1.34246	6.59e-07	0.00020032
BaP (100 µg) & C60 (1 mg)	K1R543	-0.460197	2.86359	1.55e-07	0.000124733
BaP (100 µg) & C60 (1 mg)	K1REN1	-0.528696	3.46719	0.000284836	0.00881449
BaP (100 µg) & C60 (1 mg)	A0A210PG06	0.470541	2.75553	0.000286736	0.00881449
BaP (100 µg) & C60 (1 mg)	A0A210PGL0	0.532109	3.84526	0.000101004	0.00737502
BaP (100 µg) & C60 (1 mg)	A0A210PPK1	0.498041	3.25826	0.000119199	0.00737502
BaP (100 µg) & C60 (1 mg)	A0A210PRC4	0.43664	2.55825	0.00012001	0.00737502
BaP (100 µg) & C60 (1 mg)	A0A210PST3	0.321163	1.32974	8.04e-07	0.00020032
BaP (100 µg) & C60 (1 mg)	A0A210PU63	0.40641	2.1018	0.00025389	0.00854306
BaP (100 µg) & C60 (1 mg)	A0A210Q124	0.414273	2.28508	0.000101636	0.00737502
BaP (100 µg) & C60 (1 mg)	A0A210QAX5	0.291416	1.10616	0.000342562	0.00969296
BaP (100 µg) & C60 (1 mg)	A0A210QBP4	0.414273	2.14226	3.01e-07	0.000124733
BaP (100 µg) & C60 (1 mg)	A0A210QEZ3	0.372693	1.67103	0.000271844	0.00879079
BaP (100 µg) & C60 (1 mg)	A0A210QGY4	0.296916	1.12702	0.00020668	0.00838021
BaP (100 µg) & C60 (1 mg)	A0A210QL09	0.520067	3.58006	7.94e-05	0.00737502
BaP (100 µg) & C60 (1 mg)	A0A210QM15	0.421926	2.32707	9.5e-05	0.00737502
BaP (100 µg) & C60 (1 mg)	A0A210QNT5	0.608044	4.38723	0.000115243	0.00737502
BaP (100 µg) & C60 (1 mg)	A0A210QP07	0.479861	2.8097	7.39e-05	0.00737502
BaP (100 µg) & C60 (1 mg)	A0A210QVY5	0.55995	3.65912	0.000165356	0.00838021
BaP (100 µg) & C60 (1 mg)	A0A210QY06	0.510735	3.5164	8.51e-05	0.00737502
BaP (100 µg) & C60 (1 mg)	A0A210QY40	0.503708	3.12159	0.000246142	0.00843177
BaP (100 µg) & C60 (1 mg)	A0A2T6NJM6	0.524326	3.24819	0.000281755	0.00881449
BaP (100 µg) & C60 (1 mg)	A0A2T6NQF1	0.521188	3.04955	3.26e-05	0.00476989
BaP (100 µg) & C60 (1 mg)	K1PL17	0.406893	2.24457	0.000226698	0.00838021
BaP (100 µg) & C60 (1 mg)	K1PR43	0.421926	2.32707	9.5e-05	0.00737502
BaP (100 µg) & C60 (1 mg)	K1PYC0	0.503708	3.12159	0.000205818	0.00838021
BaP (100 µg) & C60 (1 mg)	K1PZB6	0.247163	0.767612	2.23e-06	0.000427773
BaP (100 µg) & C60 (1 mg)	K1Q2V4	0.494	3.06193	0.000177642	0.00838021
BaP (100 µg) & C60 (1 mg)	K1Q4W7	0.631503	4.77093	0.000127338	0.00737502
BaP (100 µg) & C60 (1 mg)	K1QLG9	0.321163	1.32974	8.04e-07	0.00020032
BaP (100 µg) & C60 (1 mg)	K1QT07	0.34501	1.54727	0.000235588	0.00838021
BaP (100 µg) & C60 (1 mg)	K1R1Z2	0.390025	1.88293	7.5e-05	0.00737502
BaP (100 µg) & C60 (1 mg)	K1R6F3	0.390025	1.88293	0.000247197	0.00843177
BaP (100 µg) & C60 (1 mg)	K1R8T0	0.351537	1.57646	0.000203566	0.00838021
BaP (100 µg) & C60 (1 mg)	K1R9A6	0.406893	2.24457	0.000366145	0.0098557
BaP (100 µg) & C60 (1 mg)	K1RAC2	0.620723	4.47744	0.000173608	0.00838021
BaP (100 µg) & C60 (1 mg)	K1RBX7	0.446694	2.46287	0.00012736	0.00737502
BaP (100 µg) & C60 (1 mg)	K1RFT6	0.499664	2.9247	0.000206432	0.00838021
BaP (100 µg) & C60 (1 mg)	K1RL99	0.321163	1.32974	8.04e-07	0.00020032
BaP (100 µg) & C60 (1 mg)	Q9NJH2	0.510197	2.98582	0.000141711	0.00784135
BaP (100 µg) & C60 (1 mg)	A0A210Q912	0.390025	1.88293	0.000247197	0.00843177
BaP (100 µg) & C60 (1 mg)	A0A210QMU0	0.34501	1.54727	0.000235588	0.00838021
BaP (100 µg) & C60 (1 mg)	A0A210QQ93	0.467014	2.89591	0.000183541	0.00838021
BaP (100 µg) & C60 (1 mg)	A0A210R6H2	0.461578	2.70341	3.26e-05	0.00476989
BaP (100 µg) & C60 (1 mg)	A0A2T6N4G6	0.432194	2.08547	0.000232467	0.00838021
BaP (100 µg) & C60 (1 mg)	A0A2T6N9U6	0.247163	0.767612	2.23e-06	0.000427773
BaP (100 µg) & C60 (1 mg)	A0A2T6NJC1	0.458667	2.8445	2.03e-07	0.000124733
BaP (100 µg) & C60 (1 mg)	A0A2T6NMR5	0.422447	2.18431	0.00037697	0.00998569
BaP (100 µg) & C60 (1 mg)	K1P9Y6	0.609289	4.18675	9.65e-05	0.00737502
BaP (100 µg) & C60 (1 mg)	K1QC98	0.584198	4.21733	0.00011351	0.00737502
BaP (100 µg) & C60 (1 mg)	K1QFR6	0.461578	2.70341	3.26e-05	0.00476989
BaP (100 µg) & C60 (1 mg)	K1QWK0	0.398843	2.06284	0.000311567	0.00907091
BaP (100 µg) & C60 (1 mg)	K1R909	0.513808	3.18363	1.32e-07	0.000124733
BaP (100 µg) & C60 (1 mg)	K1RDQ4	0.368469	1.77924	7.47e-05	0.00737502
BaP (100 µg) & C60 (1 mg)	K1RPB4	0.34501	1.54727	0.000235588	0.00838021

## Sheet: GO_enrichment
Treatment	Ontology	Node ID	Node Name	FWER
BaP (5 µg)	MF	GO:0005509	calcium ion binding	0.049682
BaP (5 µg)	MF	GO:0003746	translation elongation factor activity	0.0471937
BaP (5 µg)	CC	GO:0005856	cytoskeleton	0.0284919
BaP (5 µg)	MF	GO:0004725	protein tyrosine phosphatase activity	0.0253223
BaP (5 µg)	MF	GO:0008017	microtubule binding	0.0235117
BaP (5 µg)	MF	GO:0015631	tubulin binding	0.0235117
BaP (50 µg)	MF	GO:0140110	transcription regulator activity	0.0398368
BaP (50 µg)	MF	GO:0043168	anion binding	0.0270706
BaP (50 µg)	CC	GO:0031974	membrane-enclosed lumen	0.0234913
BaP (50 µg)	CC	GO:0043233	organelle lumen	0.0234913
BaP (50 µg)	CC	GO:0070013	intracellular organelle lumen	0.0234913
BaP (50 µg)	BP	GO:0044260	cellular macromolecule metabolic process	0.0224817
BaP (50 µg)	BP	GO:0006807	nitrogen compound metabolic process	0.0160681
BaP (50 µg)	BP	GO:0008152	metabolic process	0.0160681
BaP (50 µg)	BP	GO:0043170	macromolecule metabolic process	0.0160681
BaP (50 µg)	BP	GO:0044237	cellular metabolic process	0.0160681
BaP (50 µg)	BP	GO:0044238	primary metabolic process	0.0160681
BaP (50 µg)	BP	GO:0071704	organic substance metabolic process	0.0160681
BaP (100 µg)	MF	GO:0004722	protein serine/threonine phosphatase activity	0.0495907
BaP (100 µg)	BP	GO:0000724	double-strand break repair via homologous recombination	0.0306951
BaP (100 µg)	BP	GO:0000725	recombinational repair	0.0306951
BaP (100 µg)	BP	GO:0006259	DNA metabolic process	0.0306951
BaP (100 µg)	BP	GO:0006281	DNA repair	0.0306951
BaP (100 µg)	BP	GO:0006302	double-strand break repair	0.0306951
BaP (100 µg)	BP	GO:0006310	DNA recombination	0.0306951
BaP (100 µg)	BP	GO:0006974	cellular response to DNA damage stimulus	0.0306951
BaP (100 µg)	BP	GO:0033554	cellular response to stress	0.0306951
BaP (100 µg)	BP	GO:0006807	nitrogen compound metabolic process	0.0229598
BaP (100 µg)	BP	GO:0008152	metabolic process	0.0229598
BaP (100 µg)	BP	GO:0043170	macromolecule metabolic process	0.0229598
BaP (100 µg)	BP	GO:0044237	cellular metabolic process	0.0229598
BaP (100 µg)	BP	GO:0044238	primary metabolic process	0.0229598
BaP (100 µg)	BP	GO:0071704	organic substance metabolic process	0.0229598
BaP (100 µg)	BP	GO:0006139	nucleobase-containing compound metabolic process	0.0110736
BaP (100 µg)	BP	GO:0006725	cellular aromatic compound metabolic process	0.0110736
BaP (100 µg)	BP	GO:0034641	cellular nitrogen compound metabolic process	0.0110736
BaP (100 µg)	BP	GO:0046483	heterocycle metabolic process	0.0110736
BaP (100 µg)	BP	GO:0090304	nucleic acid metabolic process	0.0110736
BaP (100 µg)	BP	GO:1901360	organic cyclic compound metabolic process	0.0110736
C60 (0.01 mg/L)	MF	GO:0000062	fatty-acyl-CoA binding	0.0470741
C60 (0.01 mg/L)	MF	GO:0033218	amide binding	0.0470741
C60 (0.01 mg/L)	MF	GO:0048037	cofactor binding	0.0470741
C60 (0.01 mg/L)	MF	GO:0050662	coenzyme binding	0.0470741
C60 (0.01 mg/L)	MF	GO:1901567	fatty acid derivative binding	0.0470741
C60 (0.01 mg/L)	MF	GO:1901681	sulfur compound binding	0.0470741
C60 (0.01 mg/L)	CC	GO:0005739	mitochondrion	0.0420983
C60 (0.01 mg/L)	MF	GO:0043169	cation binding	0.0275786
C60 (0.01 mg/L)	MF	GO:0046872	metal ion binding	0.0275786
C60 (0.01 mg/L)	BP	GO:0007049	cell cycle	0.0268849
C60 (0.01 mg/L)	BP	GO:0022402	cell cycle process	0.0268849
C60 (0.01 mg/L)	BP	GO:0033043	regulation of organelle organization	0.0168007
C60 (0.01 mg/L)	BP	GO:0051128	regulation of cellular component organization	0.0168007
C60 (0.01 mg/L)	BP	GO:0000226	microtubule cytoskeleton organization	0.0142548
C60 (0.1 mg/L)	CC	GO:0044422	organelle part	0.0492513
C60 (0.1 mg/L)	CC	GO:0044446	intracellular organelle part	0.0492513
C60 (0.1 mg/L)	BP	GO:0000724	double-strand break repair via homologous recombination	0.040712
C60 (0.1 mg/L)	BP	GO:0000725	recombinational repair	0.040712
C60 (0.1 mg/L)	BP	GO:0006259	DNA metabolic process	0.040712
C60 (0.1 mg/L)	BP	GO:0006281	DNA repair	0.040712
C60 (0.1 mg/L)	BP	GO:0006302	double-strand break repair	0.040712
C60 (0.1 mg/L)	BP	GO:0006310	DNA recombination	0.040712
C60 (0.1 mg/L)	BP	GO:0006950	response to stress	0.040712
C60 (0.1 mg/L)	BP	GO:0006974	cellular response to DNA damage stimulus	0.040712
C60 (0.1 mg/L)	BP	GO:0033554	cellular response to stress	0.040712
C60 (0.1 mg/L)	BP	GO:0006807	nitrogen compound metabolic process	0.0381959
C60 (0.1 mg/L)	BP	GO:0043170	macromolecule metabolic process	0.0381959
C60 (0.1 mg/L)	BP	GO:0044238	primary metabolic process	0.0381959
C60 (0.1 mg/L)	BP	GO:0071704	organic substance metabolic process	0.0381959
C60 (0.1 mg/L)	CC	GO:0031981	nuclear lumen	0.0352782
C60 (0.1 mg/L)	CC	GO:0044428	nuclear part	0.0352782
C60 (0.1 mg/L)	BP	GO:0006139	nucleobase-containing compound metabolic process	0.0227295
C60 (0.1 mg/L)	BP	GO:0006725	cellular aromatic compound metabolic process	0.0227295
C60 (0.1 mg/L)	BP	GO:0034641	cellular nitrogen compound metabolic process	0.0227295
C60 (0.1 mg/L)	BP	GO:0046483	heterocycle metabolic process	0.0227295
C60 (0.1 mg/L)	BP	GO:0090304	nucleic acid metabolic process	0.0227295
C60 (0.1 mg/L)	BP	GO:1901360	organic cyclic compound metabolic process	0.0227295
C60 (0.1 mg/L)	BP	GO:0007186	G protein-coupled receptor signaling pathway	0.0180018
C60 (0.1 mg/L)	BP	GO:0007218	neuropeptide signaling pathway	0.0180018
C60 (0.1 mg/L)	CC	GO:0031974	membrane-enclosed lumen	0.0122731
C60 (0.1 mg/L)	CC	GO:0043233	organelle lumen	0.0122731
C60 (0.1 mg/L)	CC	GO:0070013	intracellular organelle lumen	0.0122731
BaP (5 µg) & C60 (1 mg/L)	MF	GO:0005543	phospholipid binding	0.0280336
BaP (5 µg) & C60 (1 mg/L)	MF	GO:0008289	lipid binding	0.0280336
BaP (50 µg) & C60 (1 mg/L)	MF	GO:0016757	transferase activity, transferring glycosyl groups	0.0477672
BaP (50 µg) & C60 (1 mg/L)	MF	GO:0005543	phospholipid binding	0.0447918
BaP (50 µg) & C60 (1 mg/L)	MF	GO:0008289	lipid binding	0.0447918
BaP (50 µg) & C60 (1 mg/L)	MF	GO:0043168	anion binding	0.0391962
BaP (50 µg) & C60 (1 mg/L)	CC	GO:0071203	WASH complex	0.0345686
BaP (50 µg) & C60 (1 mg/L)	BP	GO:0044260	cellular macromolecule metabolic process	0.0344944
BaP (50 µg) & C60 (1 mg/L)	MF	GO:0043167	ion binding	0.019678
BaP (100 µg) & C60 (1 mg/L)	CC	GO:0000313	organellar ribosome	0.0496607
BaP (100 µg) & C60 (1 mg/L)	CC	GO:0005759	mitochondrial matrix	0.0496607
BaP (100 µg) & C60 (1 mg/L)	CC	GO:0005761	mitochondrial ribosome	0.0496607
BaP (100 µg) & C60 (1 mg/L)	CC	GO:0044429	mitochondrial part	0.0496607
BaP (100 µg) & C60 (1 mg/L)	CC	GO:0098798	mitochondrial protein complex	0.0496607
BaP (100 µg) & C60 (1 mg/L)	BP	GO:0006807	nitrogen compound metabolic process	0.0444617
BaP (100 µg) & C60 (1 mg/L)	BP	GO:0043170	macromolecule metabolic process	0.0444617
BaP (100 µg) & C60 (1 mg/L)	MF	GO:0140110	transcription regulator activity	0.0326102
BaP (100 µg) & C60 (1 mg/L)	BP	GO:0006139	nucleobase-containing compound metabolic process	0.0248218
BaP (100 µg) & C60 (1 mg/L)	BP	GO:0006725	cellular aromatic compound metabolic process	0.0248218
BaP (100 µg) & C60 (1 mg/L)	BP	GO:0034641	cellular nitrogen compound metabolic process	0.0248218
BaP (100 µg) & C60 (1 mg/L)	BP	GO:0046483	heterocycle metabolic process	0.0248218
BaP (100 µg) & C60 (1 mg/L)	BP	GO:0090304	nucleic acid metabolic process	0.0248218
BaP (100 µg) & C60 (1 mg/L)	BP	GO:1901360	organic cyclic compound metabolic process	0.0248218
BaP (100 µg) & C60 (1 mg/L)	CC	GO:0044422	organelle part	0.020825
BaP (100 µg) & C60 (1 mg/L)	CC	GO:0044446	intracellular organelle part	0.020825
BaP (100 µg) & C60 (1 mg/L)	BP	GO:0000724	double-strand break repair via homologous recombination	0.0217585
BaP (100 µg) & C60 (1 mg/L)	BP	GO:0000725	recombinational repair	0.0217585
BaP (100 µg) & C60 (1 mg/L)	BP	GO:0006302	double-strand break repair	0.0217585
BaP (100 µg) & C60 (1 mg/L)	BP	GO:0006310	DNA recombination	0.0217585
BaP (100 µg) & C60 (1 mg/L)	MF	GO:0044877	protein-containing complex binding	0.0175277
BaP (100 µg) & C60 (1 mg/L)	MF	GO:0051015	actin filament binding	0.0175277

## Sheet: KEGG_enrichment
Treartment	ID	Description	GeneRatio	BgRatio	pvalue	p.adjust	qvalue	geneID	Count
BaP (5 µg)	ko03010	Ribosome	39/422	143/12183	1.35e-24	4.62e-22	3.13e-22	K02977/K02981/K02984/K02955/K02985/K02958/K02893/K02987/K02991/K02932/K02900/K02930/K02937/K02873/K02960/K02908/K02865/K02989/K02936/K02995/K02986/K02868/K02912/K02998/K02894/K02934/K02925/K02885/K02929/K02953/K02872/K02880/K02982/K02901/K02889/K02882/K02883/K02967/K02931	39
BaP (5 µg)	ko04145	Phagosome	16/422	95/12183	1.45e-07	2.48e-05	1.68e-05	K07374/K02145/K01365/K07375/K05692/K02147/K10413/K10414/K06560/K08492/K02149/K02154/K07897/K08054/K06588/K04392	16
BaP (5 µg)	ko04144	Endocytosis	21/422	164/12183	2.26e-07	2.58e-05	1.75e-05	K03283/K04646/K11826/K17917/K02833/K04674/K00910/K12479/K09526/K06564/K11824/K07897/K12196/K04393/K05756/K12193/K12197/K19367/K12473/K18465/K12200	21
BaP (5 µg)	ko03040	Spliceosome	17/422	122/12183	9.8e-07	8.38e-05	5.67e-05	K03283/K13025/K12815/K12888/K12872/K12821/K12825/K12869/K12847/K12820/K12811/K12856/K12842/K12818/K12870/K12840/K12819	17
BaP (5 µg)	ko04141	Protein processing in endoplasmic reticulum	18/422	140/12183	1.57e-06	0.000107154	7.26e-05	K03283/K09490/K04079/K13525/K07953/K09580/K11519/K03347/K14007/K09054/K09487/K04431/K14026/K08054/K10084/K07151/K14005/K09523	18
BaP (5 µg)	ko04212	Longevity regulating pathway - worm	11/422	55/12183	2.29e-06	0.000130361	8.83e-05	K03781/K14938/K16197/K04077/K08341/K04441/K04043/K10798/K01358/K01110/K07203	11
BaP (5 µg)	ko05165	Human papillomavirus infection	24/422	239/12183	2.84e-06	0.000138839	9.4e-05	K02145/K02147/K02833/K01384/K00182/K02149/K03099/K06237/K05637/K06627/K03456/K05760/K06238/K10587/K02154/K04393/K02599/K00873/K06588/K02105/K01110/K12236/K07203/K05631	24
BaP (5 µg)	ko05205	Proteoglycans in cancer	18/422	162/12183	1.26e-05	0.00048049	0.000325355	K01365/K05692/K06269/K04437/K02991/K02833/K03685/K01384/K00182/K03099/K05760/K04441/K04393/K06588/K07831/K02105/K04392/K07203	18
BaP (5 µg)	ko04138	Autophagy - yeast	12/422	77/12183	1.22e-05	0.00048049	0.000325355	K20195/K12479/K07756/K18584/K08341/K08337/K07897/K17260/K20179/K07203/K00915/K20181	12
BaP (5 µg)	ko00020	Citrate cycle (TCA cycle)	10/422	58/12183	2.63e-05	0.000817417	0.000553499	K01681/K01899/K00031/K01647/K01596/K00234/K00235/K01676/K00164/K00025	10
BaP (5 µg)	ko00710	Carbon fixation in photosynthetic organisms	8/422	36/12183	2.5e-05	0.000817417	0.000553499	K00814/K00134/K00927/K01623/K01803/K00615/K01006/K00025	8
BaP (5 µg)	ko05225	Hepatocellular carcinoma	14/422	114/12183	3.83e-05	0.00100666	0.000681638	K00799/K05692/K02833/K04674/K01384/K00182/K03099/K04501/K11765/K02105/K01110/K11649/K07203/K11653	14
BaP (5 µg)	ko04520	Adherens junction	10/422	60/12183	3.57e-05	0.00100666	0.000681638	K05692/K05699/K04674/K05695/K04501/K04393/K05700/K02105/K04392/K05706	10
BaP (5 µg)	ko04510	Focal adhesion	16/422	148/12183	5.35e-05	0.00130609	0.000884394	K05692/K06269/K04437/K02833/K05699/K03099/K06237/K05637/K05760/K06238/K04393/K06588/K05700/K02105/K01110/K04392	16
BaP (5 µg)	ko05016	Huntington disease	16/422	149/12183	5.8e-05	0.00132316	0.000895951	K04646/K11826/K02133/K02132/K00234/K05208/K10408/K11824/K04559/K10412/K00235/K05858/K00412/K02256/K03006/K03935	16
BaP (5 µg)	ko04114	Oocyte meiosis	11/422	78/12183	7.27e-05	0.0015532	0.00105172	K02183/K06269/K16197/K03347/K02365/K06669/K04348/K03456/K03355/K02087/K06636	11
BaP (5 µg)	ko05418	Fluid shear stress and atherosclerosis	12/422	98/12183	0.000139818	0.00281282	0.00190465	K02183/K04079/K01365/K00799/K05692/K04441/K09487/K04431/K02105/K13596/K04392/K04673	12
BaP (5 µg)	ko01200	Carbon metabolism	26/422	349/12183	0.00020282	0.00315293	0.00213495	K00814/K01681/K00134/K01899/K03781/K00927/K01623/K01803/K00031/K01647/K01966/K00616/K00234/K01895/K00281/K00615/K00600/K00140/K00235/K00873/K01676/K00844/K01006/K00164/K01810/K00025	26
BaP (5 µg)	ko04218	Cellular senescence	13/422	116/12183	0.000184816	0.00315293	0.00213495	K02183/K06269/K02833/K04674/K10865/K06627/K04348/K04441/K10995/K02087/K07831/K01110/K07203	13
BaP (5 µg)	ko04530	Tight junction	12/422	101/12183	0.00018687	0.00315293	0.00213495	K07374/K05692/K05699/K10352/K18584/K03456/K21110/K04393/K17260/K04431/K04392/K05631	12
BaP (5 µg)	ko04910	Insulin signaling pathway	11/422	87/12183	0.000197891	0.00315293	0.00213495	K02183/K06269/K01596/K02991/K02833/K05695/K03099/K00688/K00844/K07203/K07190	11
BaP (5 µg)	ko03015	mRNA surveillance pathway	9/422	59/12183	0.000177993	0.00315293	0.00213495	K06269/K13025/K14411/K03456/K13126/K14408/K14376/K14327/K00565	9
BaP (5 µg)	ko04714	Thermogenesis	17/422	185/12183	0.000237384	0.00352979	0.00239013	K02133/K05692/K02132/K02991/K02833/K00234/K01897/K03099/K04441/K00235/K11649/K00412/K07203/K02256/K11653/K02259/K03935	17
BaP (5 µg)	ko04261	Adrenergic signaling in cardiomyocytes	11/422	92/12183	0.00032535	0.00458109	0.003102	K12314/K01539/K02183/K06269/K10373/K17751/K01540/K03456/K04441/K05858/K04861	11
BaP (5 µg)	ko04912	GnRH signaling pathway	9/422	64/12183	0.000334875	0.00458109	0.003102	K02183/K02833/K03099/K04441/K04393/K04431/K04428/K05858/K09203	9
BaP (5 µg)	ko01230	Biosynthesis of amino acids	19/422	230/12183	0.000409653	0.00467004	0.00316223	K00814/K01681/K00134/K00927/K01623/K01803/K00031/K01647/K00616/K01649/K00615/K00600/K00789/K01915/K00873/K00549/K00548/K01703/K00891	19
BaP (5 µg)	ko05203	Viral carcinogenesis	16/422	174/12183	0.000356798	0.00467004	0.00316223	K11252/K11254/K02833/K05699/K16197/K11594/K06627/K05760/K10587/K04393/K15979/K02087/K00873/K03142/K04392/K03141	16
BaP (5 µg)	ko04918	Thyroid hormone synthesis	8/422	52/12183	0.000382781	0.00467004	0.00316223	K01539/K09490/K01540/K09487/K08054/K05858/K15173/K06233	8
BaP (5 µg)	ko04721	Synaptic vesicle cycle	7/422	40/12183	0.000394165	0.00467004	0.00316223	K04646/K11826/K02145/K02147/K02149/K11824/K02154	7
BaP (5 µg)	ko04961	Endocrine and other factor-regulated calcium reabsorption	6/422	29/12183	0.000401942	0.00467004	0.00316223	K01539/K04646/K11826/K01540/K11824/K05858	6
BaP (5 µg)	ko05010	Alzheimer disease	14/422	143/12183	0.000437588	0.00482758	0.00326891	K02183/K02133/K00134/K02132/K05853/K00234/K05208/K04348/K09054/K00235/K05858/K00412/K02256/K03935	14
BaP (5 µg)	ko04217	Necroptosis	11/422	96/12183	0.000471674	0.00504102	0.00341343	K04079/K17065/K11974/K00522/K12196/K01915/K10798/K12193/K00688/K12197/K11251	11
BaP (5 µg)	ko05034	Alcoholism	10/422	84/12183	0.000624496	0.0062817	0.00425353	K02183/K11252/K06269/K11254/K02833/K05208/K04267/K03099/K11251/K11253	10
BaP (5 µg)	ko05014	Amyotrophic lateral sclerosis (ALS)	7/422	43/12183	0.000623038	0.0062817	0.00425353	K03781/K05208/K11519/K11518/K04348/K04441/K04392	7
BaP (5 µg)	ko04933	AGE-RAGE signaling pathway in diabetic complications	9/422	74/12183	0.000991083	0.0096843	0.00655754	K02833/K04674/K06237/K04501/K04441/K04393/K05858/K09203/K04392	9
BaP (5 µg)	ko04260	Cardiac muscle contraction	8/422	60/12183	0.00102256	0.00971431	0.00657787	K12314/K01539/K10373/K17751/K01540/K00412/K04861/K02256	8
BaP (5 µg)	ko04964	Proximal tubule bicarbonate reclamation	4/422	14/12183	0.00107745	0.00995918	0.00674367	K01539/K01596/K01540/K00025	4
BaP (5 µg)	ko04390	Hippo signaling pathway	11/422	111/12183	0.00159352	0.013974	0.00946222	K05692/K06269/K04674/K16197/K01384/K00182/K04501/K03456/K02105/K04673/K05706	11
BaP (5 µg)	ko00970	Aminoacyl-tRNA biosynthesis	8/422	64/12183	0.00156849	0.013974	0.00946222	K01870/K14163/K01889/K02433/K01868/K01867/K01893/K01876	8
BaP (5 µg)	ko01523	Antifolate resistance	5/422	26/12183	0.00175402	0.0149968	0.0101548	K05681/K00600/K05668/K05667/K01307	5
BaP (5 µg)	ko04150	mTOR signaling pathway	11/422	114/12183	0.00197566	0.0163949	0.0111015	K02145/K02147/K02991/K02833/K01384/K00182/K02149/K03099/K01110/K08272/K07203	11
BaP (5 µg)	ko05132	Salmonella infection	9/422	82/12183	0.00206135	0.0163949	0.0111015	K05692/K04437/K10413/K10414/K07897/K04441/K04393/K05756/K04392	9
BaP (5 µg)	ko04370	VEGF signaling pathway	6/422	39/12183	0.0020613	0.0163949	0.0111015	K02833/K04348/K05760/K04441/K04393/K04392	6
BaP (5 µg)	ko04140	Autophagy - animal	10/422	100/12183	0.00239924	0.0181207	0.0122701	K01365/K01363/K02833/K08341/K08337/K07897/K07831/K01110/K01379/K07203	10
BaP (5 µg)	ko04013	MAPK signaling pathway - fly	9/422	84/12183	0.00243728	0.0181207	0.0122701	K10176/K16197/K20225/K03099/K04441/K04431/K04428/K17608/K04392	9
BaP (5 µg)	ko04966	Collecting duct acid secretion	4/422	17/12183	0.00235902	0.0181207	0.0122701	K02145/K02147/K02149/K02154	4
BaP (5 µg)	ko00630	Glyoxylate and dicarboxylate metabolism	10/422	101/12183	0.00258285	0.0187944	0.0127262	K01681/K03781/K01647/K00049/K01966/K01895/K00281/K00600/K01915/K00025	10
BaP (5 µg)	ko04068	FoxO signaling pathway	10/422	102/12183	0.00277754	0.0188974	0.012796	K03781/K01596/K02833/K04674/K03099/K04501/K08341/K04441/K01110/K04288	10
BaP (5 µg)	ko00010	Glycolysis / Gluconeogenesis	10/422	103/12183	0.0029838	0.0188974	0.012796	K00134/K00927/K01623/K01803/K01596/K01895/K01835/K00873/K00844/K01810	10
BaP (5 µg)	ko04142	Lysosome	10/422	103/12183	0.0029838	0.0188974	0.012796	K04646/K01365/K01363/K01052/K06564/K12390/K02154/K12373/K12311/K01379	10
BaP (5 µg)	ko04371	Apelin signaling pathway	10/422	103/12183	0.0029838	0.0188974	0.012796	K02183/K02991/K02833/K04674/K04501/K08341/K07831/K05858/K09203/K07203	10
BaP (5 µg)	ko04070	Phosphatidylinositol signaling system	7/422	55/12183	0.0027482	0.0188974	0.012796	K02183/K07756/K18081/K10572/K05858/K01110/K00915	7
BaP (5 µg)	ko04922	Glucagon signaling pathway	7/422	55/12183	0.0027482	0.0188974	0.012796	K02183/K01596/K04348/K00873/K00688/K05858/K07190	7
BaP (5 µg)	ko04745	Phototransduction - fly	4/422	18/12183	0.002951	0.0188974	0.012796	K02183/K05692/K00910/K05858	4
BaP (5 µg)	ko05210	Colorectal cancer	8/422	71/12183	0.0030563	0.0190046	0.0128686	K02833/K04674/K03099/K04501/K02105/K04392/K07203/K08734	8
BaP (5 µg)	ko04010	MAPK signaling pathway	17/422	235/12183	0.00338032	0.0197448	0.0133698	K03283/K04437/K02833/K04674/K04429/K03099/K04348/K04441/K04393/K04431/K08052/K07831/K04428/K04376/K04392/K04861/K04422	17
BaP (5 µg)	ko04015	Rap1 signaling pathway	13/422	159/12183	0.0035453	0.0197448	0.0133698	K02183/K05692/K02833/K05208/K04267/K04441/K04393/K07831/K02105/K05858/K04392/K06070/K05631	13
BaP (5 µg)	ko04810	Regulation of actin cytoskeleton	13/422	159/12183	0.0035453	0.0197448	0.0133698	K05692/K06269/K02833/K05699/K03099/K05760/K04393/K05766/K05756/K06588/K07831/K05700/K04392	13
BaP (5 µg)	ko04919	Thyroid hormone signaling pathway	9/422	88/12183	0.00335154	0.0197448	0.0133698	K01539/K05692/K02833/K01540/K04650/K02599/K02105/K05858/K07203	9
BaP (5 µg)	ko05100	Bacterial invasion of epithelial cells	8/422	73/12183	0.0036372	0.0197448	0.0133698	K04646/K05692/K05760/K04393/K05756/K05700/K02105/K04392	8
BaP (5 µg)	ko04720	Long-term potentiation	6/422	43/12183	0.00342887	0.0197448	0.0133698	K02183/K06269/K02833/K05208/K04348/K05858	6
BaP (5 µg)	ko05130	Pathogenic Escherichia coli infection	6/422	43/12183	0.00342887	0.0197448	0.0133698	K07374/K07375/K05692/K04393/K05756/K02105	6
BaP (5 µg)	ko00511	Other glycan degradation	4/422	19/12183	0.00363696	0.0197448	0.0133698	K14459/K12373/K01206/K12311	4
BaP (5 µg)	ko00562	Inositol phosphate metabolism	8/422	74/12183	0.00395794	0.0211503	0.0143215	K01803/K22913/K18081/K00140/K10572/K05858/K01110/K00915	8
BaP (5 µg)	ko04670	Leukocyte transendothelial migration	8/422	75/12183	0.00430008	0.0224003	0.0151679	K05692/K05699/K05760/K04441/K04393/K05700/K02105/K04392	8
BaP (5 µg)	ko05322	Systemic lupus erythematosus	6/422	45/12183	0.00432286	0.0224003	0.0151679	K11252/K11254/K05699/K11251/K03161/K11253	6
BaP (5 µg)	ko04110	Cell cycle	10/422	109/12183	0.00449159	0.0229272	0.0155247	K02210/K16197/K03347/K02365/K06669/K04501/K06627/K03355/K02087/K06636	10
BaP (5 µg)	ko04915	Estrogen signaling pathway	8/422	76/12183	0.00466454	0.0234599	0.0158854	K03283/K02183/K04079/K02833/K03099/K09487/K05858/K01379	8
BaP (5 µg)	ko04071	Sphingolipid signaling pathway	8/422	78/12183	0.00546414	0.0270831	0.0183388	K02833/K03456/K04441/K05858/K01110/K04392/K01379/K04288	8
BaP (5 µg)	ko03018	RNA degradation	8/422	79/12183	0.00590116	0.028762	0.0194757	K12598/K04077/K13126/K04043/K12571/K12599/K11600/K12572	8
BaP (5 µg)	ko03050	Proteasome	6/422	48/12183	0.00597106	0.028762	0.0194757	K03028/K03061/K02725/K03066/K03032/K02728	6
BaP (5 µg)	ko00520	Amino sugar and nucleotide sugar metabolism	12/422	156/12183	0.00803434	0.0376461	0.0254913	K01836/K03431/K00523/K01835/K00820/K00698/K12373/K01183/K00963/K01784/K00844/K01810	12
BaP (5 µg)	ko00513	Various types of N-glycan biosynthesis	6/422	51/12183	0.00803556	0.0376461	0.0254913	K03843/K14459/K03844/K12373/K07151/K01231	6
BaP (5 µg)	ko04152	AMPK signaling pathway	8/422	84/12183	0.00849685	0.0392692	0.0265904	K07877/K07881/K01596/K03234/K06627/K03456/K08272/K07203	8
BaP (5 µg)	ko03460	Fanconi anemia pathway	6/422	54/12183	0.0105692	0.047831	0.0323879	K03515/K15362/K15361/K03165/K10858/K08734	6
BaP (5 µg)	ko03060	Protein export	5/422	39/12183	0.0106291	0.047831	0.0323879	K09490/K13280/K03110/K03217/K03070	5
BaP (50 µg)	ko03010	Ribosome	39/422	143/12183	1.35155e-24	4.62231e-22	3.12991e-22	K02977/K02981/K02984/K02955/K02985/K02958/K02893/K02987/K02991/K02932/K02900/K02930/K02937/K02873/K02960/K02908/K02865/K02989/K02936/K02995/K02986/K02868/K02912/K02998/K02894/K02934/K02925/K02885/K02929/K02953/K02872/K02880/K02982/K02901/K02889/K02882/K02883/K02967/K02931	39
BaP (50 µg)	ko04145	Phagosome	16/422	95/12183	1.44952e-07	2.47867e-05	1.67839e-05	K07374/K02145/K01365/K07375/K05692/K02147/K10413/K10414/K06560/K08492/K02149/K02154/K07897/K08054/K06588/K04392	16
BaP (50 µg)	ko04144	Endocytosis	21/422	164/12183	2.26419e-07	2.58118e-05	1.7478e-05	K03283/K04646/K11826/K17917/K02833/K04674/K00910/K12479/K09526/K06564/K11824/K07897/K12196/K04393/K05756/K12193/K12197/K19367/K12473/K18465/K12200	21
BaP (50 µg)	ko03040	Spliceosome	17/422	122/12183	9.79599e-07	8.37557e-05	5.67136e-05	K03283/K13025/K12815/K12888/K12872/K12821/K12825/K12869/K12847/K12820/K12811/K12856/K12842/K12818/K12870/K12840/K12819	17
BaP (50 µg)	ko04141	Protein processing in endoplasmic reticulum	18/422	140/12183	1.56658e-06	0.000107154	7.25573e-05	K03283/K09490/K04079/K13525/K07953/K09580/K11519/K03347/K14007/K09054/K09487/K04431/K14026/K08054/K10084/K07151/K14005/K09523	18
BaP (50 µg)	ko04212	Longevity regulating pathway - worm	11/422	55/12183	2.28704e-06	0.000130361	8.82716e-05	K03781/K14938/K16197/K04077/K08341/K04441/K04043/K10798/K01358/K01110/K07203	11
BaP (50 µg)	ko05165	Human papillomavirus infection	24/422	239/12183	2.84173e-06	0.000138839	9.4012e-05	K02145/K02147/K02833/K01384/K00182/K02149/K03099/K06237/K05637/K06627/K03456/K05760/K06238/K10587/K02154/K04393/K02599/K00873/K06588/K02105/K01110/K12236/K07203/K05631	24
BaP (50 µg)	ko04138	Autophagy - yeast	12/422	77/12183	1.21869e-05	0.00048049	0.000325355	K20195/K12479/K07756/K18584/K08341/K08337/K07897/K17260/K20179/K07203/K00915/K20181	12
BaP (50 µg)	ko05205	Proteoglycans in cancer	18/422	162/12183	1.26445e-05	0.00048049	0.000325355	K01365/K05692/K06269/K04437/K02991/K02833/K03685/K01384/K00182/K03099/K05760/K04441/K04393/K06588/K07831/K02105/K04392/K07203	18
BaP (50 µg)	ko00710	Carbon fixation in photosynthetic organisms	8/422	36/12183	2.49941e-05	0.000817417	0.000553499	K00814/K00134/K00927/K01623/K01803/K00615/K01006/K00025	8
BaP (50 µg)	ko00020	Citrate cycle (TCA cycle)	10/422	58/12183	2.62912e-05	0.000817417	0.000553499	K01681/K01899/K00031/K01647/K01596/K00234/K00235/K01676/K00164/K00025	10
BaP (50 µg)	ko04520	Adherens junction	10/422	60/12183	3.57108e-05	0.00100666	0.000681638	K05692/K05699/K04674/K05695/K04501/K04393/K05700/K02105/K04392/K05706	10
BaP (50 µg)	ko05225	Hepatocellular carcinoma	14/422	114/12183	3.82647e-05	0.00100666	0.000681638	K00799/K05692/K02833/K04674/K01384/K00182/K03099/K04501/K11765/K02105/K01110/K11649/K07203/K11653	14
BaP (50 µg)	ko04510	Focal adhesion	16/422	148/12183	5.34657e-05	0.00130609	0.000884394	K05692/K06269/K04437/K02833/K05699/K03099/K06237/K05637/K05760/K06238/K04393/K06588/K05700/K02105/K01110/K04392	16
BaP (50 µg)	ko05016	Huntington disease	16/422	149/12183	5.80332e-05	0.00132316	0.000895951	K04646/K11826/K02133/K02132/K00234/K05208/K10408/K11824/K04559/K10412/K00235/K05858/K00412/K02256/K03006/K03935	16
BaP (50 µg)	ko04114	Oocyte meiosis	11/422	78/12183	7.26643e-05	0.0015532	0.00105172	K02183/K06269/K16197/K03347/K02365/K06669/K04348/K03456/K03355/K02087/K06636	11
BaP (50 µg)	ko05418	Fluid shear stress and atherosclerosis	12/422	98/12183	0.000139818	0.00281282	0.00190465	K02183/K04079/K01365/K00799/K05692/K04441/K09487/K04431/K02105/K13596/K04392/K04673	12
BaP (50 µg)	ko03015	mRNA surveillance pathway	9/422	59/12183	0.000177993	0.00315293	0.00213495	K06269/K13025/K14411/K03456/K13126/K14408/K14376/K14327/K00565	9
BaP (50 µg)	ko04218	Cellular senescence	13/422	116/12183	0.000184816	0.00315293	0.00213495	K02183/K06269/K02833/K04674/K10865/K06627/K04348/K04441/K10995/K02087/K07831/K01110/K07203	13
BaP (50 µg)	ko04530	Tight junction	12/422	101/12183	0.00018687	0.00315293	0.00213495	K07374/K05692/K05699/K10352/K18584/K03456/K21110/K04393/K17260/K04431/K04392/K05631	12
BaP (50 µg)	ko04910	Insulin signaling pathway	11/422	87/12183	0.000197891	0.00315293	0.00213495	K02183/K06269/K01596/K02991/K02833/K05695/K03099/K00688/K00844/K07203/K07190	11
BaP (50 µg)	ko01200	Carbon metabolism	26/422	349/12183	0.00020282	0.00315293	0.00213495	K00814/K01681/K00134/K01899/K03781/K00927/K01623/K01803/K00031/K01647/K01966/K00616/K00234/K01895/K00281/K00615/K00600/K00140/K00235/K00873/K01676/K00844/K01006/K00164/K01810/K00025	26
BaP (50 µg)	ko04714	Thermogenesis	17/422	185/12183	0.000237384	0.00352979	0.00239013	K02133/K05692/K02132/K02991/K02833/K00234/K01897/K03099/K04441/K00235/K11649/K00412/K07203/K02256/K11653/K02259/K03935	17
BaP (50 µg)	ko04261	Adrenergic signaling in cardiomyocytes	11/422	92/12183	0.00032535	0.00458109	0.003102	K12314/K01539/K02183/K06269/K10373/K17751/K01540/K03456/K04441/K05858/K04861	11
BaP (50 µg)	ko04912	GnRH signaling pathway	9/422	64/12183	0.000334875	0.00458109	0.003102	K02183/K02833/K03099/K04441/K04393/K04431/K04428/K05858/K09203	9
BaP (50 µg)	ko05203	Viral carcinogenesis	16/422	174/12183	0.000356798	0.00467004	0.00316223	K11252/K11254/K02833/K05699/K16197/K11594/K06627/K05760/K10587/K04393/K15979/K02087/K00873/K03142/K04392/K03141	16
BaP (50 µg)	ko04918	Thyroid hormone synthesis	8/422	52/12183	0.000382781	0.00467004	0.00316223	K01539/K09490/K01540/K09487/K08054/K05858/K15173/K06233	8
BaP (50 µg)	ko04721	Synaptic vesicle cycle	7/422	40/12183	0.000394165	0.00467004	0.00316223	K04646/K11826/K02145/K02147/K02149/K11824/K02154	7
BaP (50 µg)	ko04961	Endocrine and other factor-regulated calcium reabsorption	6/422	29/12183	0.000401942	0.00467004	0.00316223	K01539/K04646/K11826/K01540/K11824/K05858	6
BaP (50 µg)	ko01230	Biosynthesis of amino acids	19/422	230/12183	0.000409653	0.00467004	0.00316223	K00814/K01681/K00134/K00927/K01623/K01803/K00031/K01647/K00616/K01649/K00615/K00600/K00789/K01915/K00873/K00549/K00548/K01703/K00891	19
BaP (50 µg)	ko05010	Alzheimer disease	14/422	143/12183	0.000437588	0.00482759	0.00326891	K02183/K02133/K00134/K02132/K05853/K00234/K05208/K04348/K09054/K00235/K05858/K00412/K02256/K03935	14
BaP (50 µg)	ko04217	Necroptosis	11/422	96/12183	0.000471674	0.00504102	0.00341343	K04079/K17065/K11974/K00522/K12196/K01915/K10798/K12193/K00688/K12197/K11251	11
BaP (50 µg)	ko05014	Amyotrophic lateral sclerosis (ALS)	7/422	43/12183	0.000623038	0.0062817	0.00425353	K03781/K05208/K11519/K11518/K04348/K04441/K04392	7
BaP (50 µg)	ko05034	Alcoholism	10/422	84/12183	0.000624496	0.0062817	0.00425353	K02183/K11252/K06269/K11254/K02833/K05208/K04267/K03099/K11251/K11253	10
BaP (50 µg)	ko04933	AGE-RAGE signaling pathway in diabetic complications	9/422	74/12183	0.000991083	0.0096843	0.00655754	K02833/K04674/K06237/K04501/K04441/K04393/K05858/K09203/K04392	9
BaP (50 µg)	ko04260	Cardiac muscle contraction	8/422	60/12183	0.00102256	0.00971431	0.00657787	K12314/K01539/K10373/K17751/K01540/K00412/K04861/K02256	8
BaP (50 µg)	ko04964	Proximal tubule bicarbonate reclamation	4/422	14/12183	0.00107745	0.00995918	0.00674367	K01539/K01596/K01540/K00025	4
BaP (50 µg)	ko00970	Aminoacyl-tRNA biosynthesis	8/422	64/12183	0.00156849	0.013974	0.00946222	K01870/K14163/K01889/K02433/K01868/K01867/K01893/K01876	8
BaP (50 µg)	ko04390	Hippo signaling pathway	11/422	111/12183	0.00159352	0.013974	0.00946222	K05692/K06269/K04674/K16197/K01384/K00182/K04501/K03456/K02105/K04673/K05706	11
BaP (50 µg)	ko01523	Antifolate resistance	5/422	26/12183	0.00175402	0.0149968	0.0101548	K05681/K00600/K05668/K05667/K01307	5
BaP (50 µg)	ko04150	mTOR signaling pathway	11/422	114/12183	0.00197566	0.0163949	0.0111015	K02145/K02147/K02991/K02833/K01384/K00182/K02149/K03099/K01110/K08272/K07203	11
BaP (50 µg)	ko04370	VEGF signaling pathway	6/422	39/12183	0.0020613	0.0163949	0.0111015	K02833/K04348/K05760/K04441/K04393/K04392	6
BaP (50 µg)	ko05132	Salmonella infection	9/422	82/12183	0.00206135	0.0163949	0.0111015	K05692/K04437/K10413/K10414/K07897/K04441/K04393/K05756/K04392	9
BaP (50 µg)	ko04966	Collecting duct acid secretion	4/422	17/12183	0.00235902	0.0181207	0.0122701	K02145/K02147/K02149/K02154	4
BaP (50 µg)	ko04140	Autophagy - animal	10/422	100/12183	0.00239924	0.0181207	0.0122701	K01365/K01363/K02833/K08341/K08337/K07897/K07831/K01110/K01379/K07203	10
BaP (50 µg)	ko04013	MAPK signaling pathway - fly	9/422	84/12183	0.00243728	0.0181207	0.0122701	K10176/K16197/K20225/K03099/K04441/K04431/K04428/K17608/K04392	9
BaP (50 µg)	ko00630	Glyoxylate and dicarboxylate metabolism	10/422	101/12183	0.00258285	0.0187944	0.0127262	K01681/K03781/K01647/K00049/K01966/K01895/K00281/K00600/K01915/K00025	10
BaP (50 µg)	ko04070	Phosphatidylinositol signaling system	7/422	55/12183	0.0027482	0.0188974	0.012796	K02183/K07756/K18081/K10572/K05858/K01110/K00915	7
BaP (50 µg)	ko04922	Glucagon signaling pathway	7/422	55/12183	0.0027482	0.0188974	0.012796	K02183/K01596/K04348/K00873/K00688/K05858/K07190	7
BaP (50 µg)	ko04068	FoxO signaling pathway	10/422	102/12183	0.00277754	0.0188974	0.012796	K03781/K01596/K02833/K04674/K03099/K04501/K08341/K04441/K01110/K04288	10
BaP (50 µg)	ko04745	Phototransduction - fly	4/422	18/12183	0.002951	0.0188974	0.012796	K02183/K05692/K00910/K05858	4
BaP (50 µg)	ko00010	Glycolysis / Gluconeogenesis	10/422	103/12183	0.0029838	0.0188974	0.012796	K00134/K00927/K01623/K01803/K01596/K01895/K01835/K00873/K00844/K01810	10
BaP (50 µg)	ko04142	Lysosome	10/422	103/12183	0.0029838	0.0188974	0.012796	K04646/K01365/K01363/K01052/K06564/K12390/K02154/K12373/K12311/K01379	10
BaP (50 µg)	ko04371	Apelin signaling pathway	10/422	103/12183	0.0029838	0.0188974	0.012796	K02183/K02991/K02833/K04674/K04501/K08341/K07831/K05858/K09203/K07203	10
BaP (50 µg)	ko05210	Colorectal cancer	8/422	71/12183	0.0030563	0.0190046	0.0128686	K02833/K04674/K03099/K04501/K02105/K04392/K07203/K08734	8
BaP (50 µg)	ko04919	Thyroid hormone signaling pathway	9/422	88/12183	0.00335154	0.0197448	0.0133698	K01539/K05692/K02833/K01540/K04650/K02599/K02105/K05858/K07203	9
BaP (50 µg)	ko04010	MAPK signaling pathway	17/422	235/12183	0.00338032	0.0197448	0.0133698	K03283/K04437/K02833/K04674/K04429/K03099/K04348/K04441/K04393/K04431/K08052/K07831/K04428/K04376/K04392/K04861/K04422	17
BaP (50 µg)	ko04720	Long-term potentiation	6/422	43/12183	0.00342886	0.0197448	0.0133698	K02183/K06269/K02833/K05208/K04348/K05858	6
BaP (50 µg)	ko05130	Pathogenic Escherichia coli infection	6/422	43/12183	0.00342886	0.0197448	0.0133698	K07374/K07375/K05692/K04393/K05756/K02105	6
BaP (50 µg)	ko04015	Rap1 signaling pathway	13/422	159/12183	0.0035453	0.0197448	0.0133698	K02183/K05692/K02833/K05208/K04267/K04441/K04393/K07831/K02105/K05858/K04392/K06070/K05631	13
BaP (50 µg)	ko04810	Regulation of actin cytoskeleton	13/422	159/12183	0.0035453	0.0197448	0.0133698	K05692/K06269/K02833/K05699/K03099/K05760/K04393/K05766/K05756/K06588/K07831/K05700/K04392	13
BaP (50 µg)	ko00511	Other glycan degradation	4/422	19/12183	0.00363696	0.0197448	0.0133698	K14459/K12373/K01206/K12311	4
BaP (50 µg)	ko05100	Bacterial invasion of epithelial cells	8/422	73/12183	0.0036372	0.0197448	0.0133698	K04646/K05692/K05760/K04393/K05756/K05700/K02105/K04392	8
BaP (50 µg)	ko00562	Inositol phosphate metabolism	8/422	74/12183	0.00395794	0.0211503	0.0143215	K01803/K22913/K18081/K00140/K10572/K05858/K01110/K00915	8
BaP (50 µg)	ko04670	Leukocyte transendothelial migration	8/422	75/12183	0.00430008	0.0224003	0.0151679	K05692/K05699/K05760/K04441/K04393/K05700/K02105/K04392	8
BaP (50 µg)	ko05322	Systemic lupus erythematosus	6/422	45/12183	0.00432286	0.0224003	0.0151679	K11252/K11254/K05699/K11251/K03161/K11253	6
BaP (50 µg)	ko04110	Cell cycle	10/422	109/12183	0.00449159	0.0229272	0.0155247	K02210/K16197/K03347/K02365/K06669/K04501/K06627/K03355/K02087/K06636	10
BaP (50 µg)	ko04915	Estrogen signaling pathway	8/422	76/12183	0.00466454	0.0234599	0.0158854	K03283/K02183/K04079/K02833/K03099/K09487/K05858/K01379	8
BaP (50 µg)	ko04071	Sphingolipid signaling pathway	8/422	78/12183	0.00546414	0.0270831	0.0183388	K02833/K03456/K04441/K05858/K01110/K04392/K01379/K04288	8
BaP (50 µg)	ko03018	RNA degradation	8/422	79/12183	0.00590116	0.028762	0.0194757	K12598/K04077/K13126/K04043/K12571/K12599/K11600/K12572	8
BaP (50 µg)	ko03050	Proteasome	6/422	48/12183	0.00597106	0.028762	0.0194757	K03028/K03061/K02725/K03066/K03032/K02728	6
BaP (50 µg)	ko00520	Amino sugar and nucleotide sugar metabolism	12/422	156/12183	0.00803434	0.0376461	0.0254913	K01836/K03431/K00523/K01835/K00820/K00698/K12373/K01183/K00963/K01784/K00844/K01810	12
BaP (50 µg)	ko00513	Various types of N-glycan biosynthesis	6/422	51/12183	0.00803556	0.0376461	0.0254913	K03843/K14459/K03844/K12373/K07151/K01231	6
BaP (50 µg)	ko04152	AMPK signaling pathway	8/422	84/12183	0.00849685	0.0392692	0.0265904	K07877/K07881/K01596/K03234/K06627/K03456/K08272/K07203	8
BaP (50 µg)	ko03460	Fanconi anemia pathway	6/422	54/12183	0.0105692	0.047831	0.0323879	K03515/K15362/K15361/K03165/K10858/K08734	6
BaP (50 µg)	ko03060	Protein export	5/422	39/12183	0.0106291	0.047831	0.0323879	K09490/K13280/K03110/K03217/K03070	5
BaP (100 µg)	ko03010	Ribosome	35/386	143/12183	9.31414e-22	3.12955e-19	2.13735e-19	K02901/K02981/K02936/K02991/K02932/K02955/K02987/K02985/K02984/K02893/K02958/K02998/K02882/K02900/K02937/K02977/K02873/K02960/K02930/K02883/K02953/K02941/K02925/K02908/K02865/K02910/K02894/K02889/K02929/K02986/K02934/K02989/K02872/K02931/K02912	35
BaP (100 µg)	ko04530	Tight junction	15/386	101/12183	6.15615e-07	8.32825e-05	5.68784e-05	K07374/K18584/K05692/K10352/K04393/K05699/K17260/K05719/K04392/K04431/K04514/K16684/K21110/K07198/K04416	15
BaP (100 µg)	ko05205	Proteoglycans in cancer	19/386	162/12183	8.70954e-07	8.32825e-05	5.68784e-05	K04437/K04441/K05692/K02991/K04393/K06269/K01365/K02833/K04371/K01558/K00408/K01116/K05719/K05099/K06225/K04392/K01384/K04514/K16865	19
BaP (100 µg)	ko04510	Focal adhesion	18/386	148/12183	9.91458e-07	8.32825e-05	5.68784e-05	K04437/K05692/K04393/K06269/K05699/K02833/K04371/K05637/K04349/K05719/K05099/K04725/K04392/K06238/K06590/K04659/K04514/K06252	18
BaP (100 µg)	ko04145	Phagosome	14/386	95/12183	1.60808e-06	9.36236e-05	6.39409e-05	K07374/K07375/K07897/K05692/K02147/K01365/K10414/K02145/K10413/K05719/K04392/K02152/K04659/K00914	14
BaP (100 µg)	ko00020	Citrate cycle (TCA cycle)	11/386	58/12183	1.67185e-06	9.36236e-05	6.39409e-05	K01899/K01596/K00031/K00235/K01647/K00164/K00239/K01681/K00030/K00025/K00234	11
BaP (100 µg)	ko04141	Protein processing in endoplasmic reticulum	16/386	140/12183	8.94299e-06	0.000429263	0.000293169	K04079/K03283/K09490/K07953/K09487/K09580/K13525/K10601/K04523/K09523/K09562/K03347/K04431/K14026/K01456/K08056	16
BaP (100 µg)	ko04664	Fc epsilon RI signaling pathway	9/386	47/12183	1.37373e-05	0.000576966	0.000394043	K04441/K02833/K04371/K01116/K04430/K00461/K04392/K04431/K16342	9
BaP (100 µg)	ko04144	Endocytosis	17/386	164/12183	1.74087e-05	0.000649926	0.000443872	K03283/K07897/K04646/K04393/K02833/K12480/K00910/K11826/K18442/K12196/K12193/K12473/K18466/K12495/K17920/K06564/K10365	17
BaP (100 µg)	ko04964	Proximal tubule bicarbonate reclamation	5/386	14/12183	4.91733e-05	0.00165222	0.0011284	K01539/K01596/K00261/K18245/K00025	5
BaP (100 µg)	ko05034	Alcoholism	11/386	84/12183	6.52095e-05	0.00199186	0.00136035	K02183/K11252/K11254/K06269/K02833/K04371/K00501/K00908/K11251/K04630/K00274	11
BaP (100 µg)	ko04910	Insulin signaling pathway	11/386	87/12183	9.03174e-05	0.00252889	0.00172712	K02183/K01596/K02991/K06269/K02833/K04371/K07190/K00688/K00665/K07192/K07198	11
BaP (100 µg)	ko05231	Choline metabolism in cancer	9/386	61/12183	0.000118211	0.00277645	0.0018962	K02833/K04371/K15377/K14387/K01116/K04392/K06515/K08202/K16342	9
BaP (100 µg)	ko01200	Carbon metabolism	25/386	349/12183	0.000124154	0.00277645	0.0018962	K01899/K01623/K00927/K00134/K00031/K00235/K00261/K00814/K01647/K01966/K03781/K00164/K00281/K00239/K01803/K01681/K01963/K01965/K00030/K00297/K00140/K00025/K00234/K01895/K00600	25
BaP (100 µg)	ko04360	Axon guidance	13/386	122/12183	0.000127662	0.00277645	0.0018962	K04393/K02833/K04371/K00408/K01116/K05719/K05099/K06225/K04969/K04392/K06841/K04514/K04630	13
BaP (100 µg)	ko01230	Biosynthesis of amino acids	19/386	230/12183	0.000132212	0.00277645	0.0018962	K01623/K00789/K00927/K00134/K00031/K00814/K01647/K00265/K01814/K01803/K01681/K00826/K00549/K00548/K01649/K00030/K00600/K00800/K00264	19
BaP (100 µg)	ko04912	GnRH signaling pathway	9/386	64/12183	0.000172668	0.00341273	0.00233075	K02183/K04441/K04393/K02833/K04371/K04430/K04431/K16342/K04416	9
BaP (100 µg)	ko04370	VEGF signaling pathway	7/386	39/12183	0.00019428	0.00362655	0.00247678	K04441/K04393/K02833/K04371/K01116/K04392/K16342	7
BaP (100 µg)	ko05132	Salmonella infection	10/386	82/12183	0.000253934	0.00423698	0.00289367	K04437/K07897/K04441/K05692/K04393/K04371/K10414/K10413/K04392/K04514	10
BaP (100 µg)	ko05225	Hepatocellular carcinoma	12/386	114/12183	0.000258762	0.00423698	0.00289367	K05692/K00799/K02833/K04371/K01558/K00408/K04491/K01116/K11653/K05099/K01384/K03068	12
BaP (100 µg)	ko05418	Fluid shear stress and atherosclerosis	11/386	98/12183	0.000264811	0.00423698	0.00289367	K04079/K02183/K04441/K05692/K00799/K09487/K01365/K04430/K04392/K04431/K07198	11
BaP (100 µg)	ko00983	Drug metabolism - other enzymes	6/386	31/12183	0.000365704	0.0055853	0.00381452	K00799/K01195/K00876/K03782/K00088/K00106	6
BaP (100 µg)	ko04919	Thyroid hormone signaling pathway	10/386	88/12183	0.000452836	0.00661535	0.004518	K01539/K05692/K02833/K04371/K11644/K00408/K02599/K01116/K08524/K06062	10
BaP (100 µg)	ko04146	Peroxisome	9/386	73/12183	0.000473805	0.00663327	0.00453024	K00031/K03781/K01796/K13342/K01640/K01897/K05678/K13348/K00106	9
BaP (100 µg)	ko05120	Epithelial cell signaling in Helicobacter pylori infection	10/386	90/12183	0.00054267	0.00702689	0.00479907	K04441/K02147/K04393/K02145/K01116/K08303/K04430/K05099/K04392/K02152	10
BaP (100 µg)	ko00480	Glutathione metabolism	7/386	46/12183	0.000558832	0.00702689	0.00479907	K00031/K00799/K01255/K01256/K01469/K00432/K18592	7
BaP (100 µg)	ko04670	Leukocyte transendothelial migration	9/386	75/12183	0.000579835	0.00702689	0.00479907	K04441/K05692/K04393/K05699/K01116/K05719/K04392/K04514/K04630	9
BaP (100 µg)	ko05200	Pathways in cancer	26/386	409/12183	0.000591587	0.00702689	0.00479907	K04079/K02183/K00799/K09487/K04393/K02833/K04371/K05119/K01558/K05637/K00408/K09095/K02599/K04491/K01116/K05719/K03347/K05099/K06225/K04725/K08524/K04392/K01384/K03068/K04514/K04630	26
BaP (100 µg)	ko05165	Human papillomavirus infection	18/386	239/12183	0.000606488	0.00702689	0.00479907	K02147/K04393/K02833/K04371/K01558/K05637/K00408/K02599/K02145/K04491/K05719/K12236/K01384/K06238/K06590/K02152/K04659/K06252	18
BaP (100 µg)	ko04261	Adrenergic signaling in cardiomyocytes	10/386	92/12183	0.000646782	0.00724396	0.00494732	K01539/K02183/K12314/K04441/K17751/K10373/K06269/K04371/K04862/K04630	10
BaP (100 µg)	ko04921	Oxytocin signaling pathway	11/386	111/12183	0.000775396	0.00840429	0.00573978	K02183/K05692/K06269/K02833/K04371/K04862/K03234/K04514/K16342/K04630/K07198	11
BaP (100 µg)	ko00710	Carbon fixation in photosynthetic organisms	6/386	36/12183	0.000846506	0.00888832	0.00607034	K01623/K00927/K00134/K00814/K01803/K00025	6
BaP (100 µg)	ko04217	Necroptosis	10/386	96/12183	0.000904721	0.00921171	0.0062912	K04079/K00261/K00688/K12196/K11974/K12193/K04725/K11251/K17065/K16342	10
BaP (100 µg)	ko04150	mTOR signaling pathway	11/386	114/12183	0.000968992	0.00957592	0.00653995	K02991/K02147/K02833/K04371/K01558/K00408/K02145/K01384/K02152/K03068/K07198	11
BaP (100 µg)	ko04916	Melanogenesis	8/386	67/12183	0.00120212	0.0115404	0.0078816	K02183/K02833/K04371/K01558/K00408/K04491/K01384/K04630	8
BaP (100 µg)	ko00630	Glyoxylate and dicarboxylate metabolism	10/386	101/12183	0.00134015	0.0125081	0.00854248	K01647/K01966/K03781/K00281/K01681/K01965/K00025/K01895/K00600/K11473	10
BaP (100 µg)	ko00280	Valine, leucine and isoleucine degradation	8/386	69/12183	0.00145886	0.013248	0.00904782	K01966/K13524/K01640/K00826/K01965/K00166/K00140/K00022	8
BaP (100 µg)	ko00190	Oxidative phosphorylation	16/386	217/12183	0.00149956	0.0132593	0.00905552	K02133/K02112/K02147/K02132/K00235/K02274/K03937/K00333/K00331/K00239/K02145/K00412/K01544/K00234/K02152/K03880	16
BaP (100 µg)	ko03040	Spliceosome	11/386	122/12183	0.00168791	0.0142907	0.00975991	K03283/K12815/K11088/K12867/K13025/K12861/K12819/K12890/K12870/K12874/K12828	11
BaP (100 µg)	ko04966	Collecting duct acid secretion	4/386	17/12183	0.00170127	0.0142907	0.00975991	K02147/K02145/K18245/K02152	4
BaP (100 µg)	ko04611	Platelet activation	9/386	89/12183	0.00199101	0.0163165	0.0111435	K04441/K05692/K06269/K04371/K05719/K08508/K04514/K16342/K04630	9
BaP (100 µg)	ko05226	Gastric cancer	10/386	107/12183	0.00207343	0.0164208	0.0112147	K02833/K04371/K01558/K00408/K04491/K05658/K05099/K08524/K01384/K03068	10
BaP (100 µg)	ko05410	Hypertrophic cardiomyopathy (HCM)	8/386	73/12183	0.002102	0.0164208	0.0112147	K12314/K05692/K10373/K05719/K04862/K12567/K06590/K07198	8
BaP (100 µg)	ko04722	Neurotrophin signaling pathway	9/386	90/12183	0.00215193	0.0164208	0.0112147	K02183/K04441/K04393/K02833/K04371/K01116/K04392/K04431/K04416	9
BaP (100 µg)	ko05130	Pathogenic Escherichia coli infection	6/386	43/12183	0.00219921	0.0164208	0.0112147	K07374/K07375/K05692/K04393/K05719/K04514	6
BaP (100 µg)	ko04714	Thermogenesis	14/386	185/12183	0.00228351	0.0166796	0.0113914	K02133/K04441/K05692/K02991/K02132/K00235/K02833/K03937/K00412/K11653/K01897/K00234/K03880/K07198	14
BaP (100 µg)	ko03015	mRNA surveillance pathway	7/386	59/12183	0.00250497	0.0179079	0.0122303	K13126/K06269/K14411/K11124/K14327/K13025/K03267	7
BaP (100 µg)	ko04915	Estrogen signaling pathway	8/386	76/12183	0.00271637	0.0185715	0.0126835	K04079/K03283/K02183/K09487/K02833/K04371/K09571/K04630	8
BaP (100 µg)	ko04520	Adherens junction	7/386	60/12183	0.00276033	0.0185715	0.0126835	K05692/K04393/K05699/K04371/K04491/K05099/K04392	7
BaP (100 µg)	ko05016	Huntington disease	12/386	149/12183	0.00276361	0.0185715	0.0126835	K02133/K04646/K02132/K00235/K10408/K03937/K11644/K11826/K00412/K03006/K04648/K00234	12
BaP (100 µg)	ko05145	Toxoplasmosis	9/386	94/12183	0.00290212	0.0191199	0.0130581	K03283/K04441/K04371/K05637/K05719/K00461/K04725/K12473/K04630	9
BaP (100 µg)	ko04071	Sphingolipid signaling pathway	8/386	78/12183	0.00319819	0.0206652	0.0141135	K04441/K02833/K04371/K04710/K04392/K00654/K04514/K04630	8
BaP (100 µg)	ko05131	Shigellosis	7/386	64/12183	0.00398636	0.025272	0.0172597	K04441/K05692/K04393/K04371/K05719/K04392/K04514	7
BaP (100 µg)	ko04810	Regulation of actin cytoskeleton	12/386	159/12183	0.004684	0.0291449	0.0199047	K05692/K04393/K06269/K05699/K02833/K04371/K05729/K05719/K04392/K05749/K06590/K04514	12
BaP (100 µg)	ko00250	Alanine, aspartate and glutamate metabolism	7/386	68/12183	0.00558665	0.0341293	0.0233089	K00261/K00814/K00278/K01756/K13524/K00265/K00264	7
BaP (100 µg)	ko04010	MAPK signaling pathway	15/386	235/12183	0.00794627	0.0473019	0.0323052	K04437/K03283/K04441/K04393/K02833/K04371/K04412/K04349/K04862/K04430/K05099/K04392/K04431/K16342/K04416	15
BaP (100 µg)	ko00380	Tryptophan metabolism	7/386	73/12183	0.00821119	0.0473019	0.0323052	K03781/K00164/K03782/K00022/K00452/K00274/K00252	7
BaP (100 µg)	ko04721	Synaptic vesicle cycle	5/386	40/12183	0.00822341	0.0473019	0.0323052	K04646/K02147/K02145/K11826/K02152	5
BaP (100 µg)	ko05211	Renal cell carcinoma	6/386	56/12183	0.00830599	0.0473019	0.0323052	K04393/K02833/K04371/K09095/K05099/K04392	6
C60 (0.01 mg/L)	ko03010	Ribosome	19/245	143/12191	6.56604e-11	1.99608e-08	1.55511e-08	K02964/K02925/K02932/K02936/K02960/K02893/K02917/K02873/K02930/K02984/K02941/K02923/K02872/K02870/K02906/K02938/K02865/K02915/K02882	19
C60 (0.01 mg/L)	ko04141	Protein processing in endoplasmic reticulum	17/245	140/12191	2.82221e-09	4.28977e-07	3.3421e-07	K03283/K13250/K12666/K09582/K12670/K01230/K13993/K08057/K04079/K09580/K09486/K09490/K09027/K04431/K09521/K10088/K09540	17
C60 (0.01 mg/L)	ko01200	Carbon metabolism	17/245	349/12191	0.000692146	0.012751	0.00993415	K00134/K01895/K01623/K01681/K01689/K00615/K01647/K01899/K00140/K00640/K03841/K01966/K00025/K00031/K01965/K00844/K00033	17
C60 (0.01 mg/L)	ko04145	Phagosome	11/245	95/12191	3.04388e-06	0.000288187	0.000224523	K04392/K10414/K05692/K02147/K02145/K08057/K01365/K07897/K06560/K03662/K12478	11
C60 (0.01 mg/L)	ko05170	Human immunodeficiency virus 1 infection	11/245	163/12191	0.000450588	0.0110979	0.0086462	K04427/K04448/K04392/K08057/K04398/K04728/K17834/K04467/K02183/K04431/K05410	11
C60 (0.01 mg/L)	ko04144	Endocytosis	11/245	164/12191	0.00047458	0.0110979	0.0086462	K03283/K04646/K17917/K07905/K18441/K06564/K18462/K05755/K07897/K12478/K18468	11
C60 (0.01 mg/L)	ko05169	Epstein-Barr virus infection	11/245	171/12191	0.000674337	0.012751	0.00993415	K04427/K04448/K04392/K08057/K04398/K04467/K03511/K04431/K03061/K03028/K05410	11
C60 (0.01 mg/L)	ko05418	Fluid shear stress and atherosclerosis	10/245	98/12191	2.65882e-05	0.00161656	0.00125944	K04427/K04448/K04392/K05692/K04079/K04467/K01365/K00799/K02183/K04431	10
C60 (0.01 mg/L)	ko04621	NOD-like receptor signaling pathway	10/245	136/12191	0.000414893	0.0110979	0.0086462	K04427/K04448/K15040/K04079/K04398/K04467/K16060/K20915/K20899/K05410	10
C60 (0.01 mg/L)	ko04624	Toll and Imd signaling pathway	8/245	47/12191	3.79194e-06	0.000288187	0.000224523	K04427/K04448/K04398/K10380/K04431/K16060/K04428/K13411	8
C60 (0.01 mg/L)	ko04152	AMPK signaling pathway	8/245	84/12191	0.000277427	0.00843379	0.00657065	K04427/K00693/K01596/K03234/K00021/K07905/K11262/K03841	8
C60 (0.01 mg/L)	ko04217	Necroptosis	8/245	96/12191	0.000686554	0.012751	0.00993415	K10802/K15040/K04079/K04398/K05863/K10798/K00688/K16060	8
C60 (0.01 mg/L)	ko04530	Tight junction	8/245	101/12191	0.000960345	0.0145973	0.0113725	K04448/K04392/K18584/K05699/K05692/K05762/K04431/K06094	8
C60 (0.01 mg/L)	ko00010	Glycolysis / Gluconeogenesis	8/245	103/12191	0.00109175	0.015086	0.0117533	K00134/K01895/K01623/K01596/K01689/K00128/K03841/K00844	8
C60 (0.01 mg/L)	ko04210	Apoptosis	8/245	109/12191	0.00157408	0.0184047	0.0143388	K04448/K05692/K04398/K04728/K10798/K04467/K01365/K16060	8
C60 (0.01 mg/L)	ko00480	Glutathione metabolism	7/245	46/12191	3.33299e-05	0.00168871	0.00131565	K01255/K05361/K00802/K00799/K00031/K00033/K01256	7
C60 (0.01 mg/L)	ko04214	Apoptosis - fly	7/245	56/12191	0.000121752	0.00516639	0.00402506	K04427/K04448/K04398/K04728/K10798/K10586/K04431	7
C60 (0.01 mg/L)	ko04620	Toll-like receptor signaling pathway	7/245	76/12191	0.000816837	0.0137955	0.0107479	K04427/K04448/K04392/K04398/K04467/K04431/K05410	7
C60 (0.01 mg/L)	ko04657	IL-17 signaling pathway	7/245	81/12191	0.00119366	0.0151197	0.0117796	K04427/K04448/K11849/K04079/K04398/K04467/K05410	7
C60 (0.01 mg/L)	ko05132	Salmonella infection	7/245	82/12191	0.00128316	0.0156032	0.0121563	K04448/K04437/K04392/K10414/K05692/K05755/K07897	7
C60 (0.01 mg/L)	ko04910	Insulin signaling pathway	7/245	87/12191	0.00181228	0.0204049	0.0158972	K00693/K01596/K11262/K00688/K03841/K02183/K00844	7
C60 (0.01 mg/L)	ko04668	TNF signaling pathway	7/245	90/12191	0.00220267	0.02309	0.0179891	K04427/K04448/K04398/K04467/K04431/K16060/K07763	7
C60 (0.01 mg/L)	ko05120	Epithelial cell signaling in Helicobacter pylori infection	7/245	90/12191	0.00220267	0.02309	0.0179891	K04448/K04392/K02147/K02145/K04467/K06059/K03662	7
C60 (0.01 mg/L)	ko04140	Autophagy - animal	7/245	100/12191	0.0039869	0.0378755	0.0295083	K04427/K10802/K17589/K17908/K01365/K08333/K07897	7
C60 (0.01 mg/L)	ko01524	Platinum drug resistance	6/245	45/12191	0.000261743	0.00843379	0.00657065	K03164/K04398/K04728/K00799/K16060/K17686	6
C60 (0.01 mg/L)	ko00020	Citrate cycle (TCA cycle)	6/245	58/12191	0.00104667	0.015086	0.0117533	K01596/K01681/K01647/K01899/K00025/K00031	6
C60 (0.01 mg/L)	ko03015	mRNA surveillance pathway	6/245	59/12191	0.00114589	0.0151197	0.0117796	K12882/K11124/K14411/K08873/K13171/K14416	6
C60 (0.01 mg/L)	ko04146	Peroxisome	6/245	73/12191	0.00343026	0.0336387	0.0262074	K00649/K13344/K13338/K00031/K00232/K13345	6
C60 (0.01 mg/L)	ko00710	Carbon fixation in photosynthetic organisms	5/245	36/12191	0.000713051	0.012751	0.00993415	K00134/K01623/K00615/K03841/K00025	5
C60 (0.01 mg/L)	ko05416	Viral myocarditis	5/245	38/12191	0.000918897	0.0145973	0.0113725	K04392/K05692/K04398/K06265/K17751	5
C60 (0.01 mg/L)	ko05110	Vibrio cholerae infection	5/245	48/12191	0.00266392	0.0269943	0.0210309	K09582/K05692/K02147/K02145/K03662	5
C60 (0.01 mg/L)	ko04922	Glucagon signaling pathway	5/245	55/12191	0.00483171	0.0445103	0.0346774	K00693/K01596/K11262/K00688/K02183	5
C60 (0.01 mg/L)	ko04964	Proximal tubule bicarbonate reclamation	4/245	14/12191	0.000135958	0.00516639	0.00402506	K01596/K12040/K01539/K00025	4
C60 (0.1 mg/L)	ko03010	Ribosome	24/211	143/12191	2.59177e-17	6.86818e-15	5.62004e-15	K02917/K02934/K02930/K02880/K02941/K02903/K02936/K02893/K02872/K02870/K02993/K02877/K02915/K02883/K02873/K02984/K02981/K02938/K02991/K02932/K02987/K02863/K02889/K02955	24
C60 (0.1 mg/L)	ko04141	Protein processing in endoplasmic reticulum	11/211	140/12191	3.09997e-05	0.00333353	0.00272774	K03283/K09490/K04079/K09580/K08057/K09582/K01230/K09556/K12666/K09027/K13250	11
C60 (0.1 mg/L)	ko05010	Alzheimer disease	11/211	143/12191	3.77381e-05	0.00333353	0.00272774	K02133/K02262/K05210/K02132/K00235/K03945/K04398/K00134/K02183/K05853/K04550	11
C60 (0.1 mg/L)	ko04144	Endocytosis	11/211	164/12191	0.000130761	0.0063429	0.00519022	K17917/K19476/K03283/K04393/K06564/K11839/K12182/K18464/K07905/K18468/K13712	11
C60 (0.1 mg/L)	ko05016	Huntington disease	10/211	149/12191	0.000262965	0.00774285	0.00633576	K10408/K02133/K02262/K05210/K02132/K00235/K03945/K04398/K15040/K05863	10
C60 (0.1 mg/L)	ko04150	mTOR signaling pathway	9/211	114/12191	0.000158393	0.0063429	0.00519022	K02147/K02145/K02144/K10421/K00444/K04373/K02149/K02991/K03068	9
C60 (0.1 mg/L)	ko04145	Phagosome	8/211	95/12191	0.000235905	0.00774285	0.00633576	K05692/K12182/K02147/K02145/K08057/K02144/K10414/K02149	8
C60 (0.1 mg/L)	ko04217	Necroptosis	7/211	96/12191	0.00136529	0.0301502	0.0246711	K04079/K17065/K04398/K10798/K15040/K00688/K05863	7
C60 (0.1 mg/L)	ko05110	Vibrio cholerae infection	6/211	48/12191	0.000167548	0.0063429	0.00519022	K05692/K02147/K02145/K02144/K09582/K02149	6
C60 (0.1 mg/L)	ko00020	Citrate cycle (TCA cycle)	6/211	58/12191	0.000478744	0.0126867	0.0103812	K01681/K01596/K00025/K00031/K00235/K01900	6
C60 (0.1 mg/L)	ko00480	Glutathione metabolism	5/211	46/12191	0.00114022	0.0274689	0.022477	K00799/K04097/K01255/K00031/K00802	5
C60 (0.1 mg/L)	ko04964	Proximal tubule bicarbonate reclamation	4/211	14/12191	7.61942e-05	0.00504786	0.00413053	K01596/K00025/K01539/K12040	4
C60 (1 mg/L)	ko03010	Ribosome	35/263	143/12191	1.83283e-27	5.60845e-25	4.24444e-25	K02991/K02901/K02868/K02896/K02900/K02936/K02870/K02930/K02941/K02922/K02917/K02938/K02997/K02923/K02893/K02984/K02903/K02934/K02915/K02969/K02882/K02872/K02964/K02880/K02953/K02981/K02925/K02918/K02889/K02955/K02866/K02865/K02932/K02906/K02960	35
C60 (1 mg/L)	ko04141	Protein processing in endoplasmic reticulum	16/263	140/12191	5.45726e-08	5.5664e-06	4.21262e-06	K09580/K09027/K12670/K04079/K03283/K09490/K13993/K09556/K09582/K09486/K04431/K01230/K09584/K08057/K08860/K08056	16
C60 (1 mg/L)	ko05010	Alzheimer disease	15/263	143/12191	4.445e-07	3.40042e-05	2.57342e-05	K02133/K02183/K06704/K00235/K04550/K00134/K04397/K03945/K05210/K06059/K02132/K01408/K04398/K08860/K02256	15
C60 (1 mg/L)	ko04214	Apoptosis - fly	12/263	56/12191	1.90104e-09	2.90859e-07	2.2012e-07	K03386/K10798/K04728/K04427/K04431/K04397/K07611/K10586/K08791/K04398/K08860/K04448	12
C60 (1 mg/L)	ko05170	Human immunodeficiency virus 1 infection	12/263	163/12191	0.000213976	0.00654766	0.00495523	K04392/K02183/K17834/K04728/K04427/K04431/K04730/K04398/K04456/K08057/K04448/K08056	12
C60 (1 mg/L)	ko05169	Epstein-Barr virus infection	12/263	171/12191	0.00033317	0.00816353	0.00617811	K03061/K04392/K03511/K04427/K04431/K12646/K04730/K04398/K04456/K08057/K04448/K08056	12
C60 (1 mg/L)	ko04714	Thermogenesis	12/263	185/12191	0.000677056	0.0135257	0.0102362	K02991/K05692/K02133/K08766/K00235/K08041/K03945/K11651/K11653/K11647/K02132/K02256	12
C60 (1 mg/L)	ko04210	Apoptosis	11/263	109/12191	2.26441e-05	0.00138582	0.00104878	K05692/K06114/K01365/K10798/K04728/K04397/K07611/K04398/K04456/K08860/K04448	11
C60 (1 mg/L)	ko04145	Phagosome	10/263	95/12191	3.70992e-05	0.00189206	0.0014319	K05692/K02144/K04392/K10414/K01365/K07897/K02149/K02147/K08057/K02145	10
C60 (1 mg/L)	ko05418	Fluid shear stress and atherosclerosis	10/263	98/12191	4.85881e-05	0.002124	0.00160743	K05692/K04079/K04392/K02183/K01365/K04427/K04431/K00799/K04456/K04448	10
C60 (1 mg/L)	ko04932	Non-alcoholic fatty liver disease (NAFLD)	10/263	124/12191	0.000346817	0.00816353	0.00617811	K09027/K04392/K00235/K04397/K03945/K04398/K04456/K08860/K04448/K02256	10
C60 (1 mg/L)	ko04510	Focal adhesion	10/263	148/12191	0.00137932	0.0192024	0.0145323	K05692/K06238/K04437/K05699/K05700/K04392/K17448/K04349/K04456/K04448	10
C60 (1 mg/L)	ko05016	Huntington disease	10/263	149/12191	0.00145111	0.0192024	0.0145323	K10410/K02133/K04646/K00235/K10408/K03945/K05210/K02132/K04398/K02256	10
C60 (1 mg/L)	ko04150	mTOR signaling pathway	9/263	114/12191	0.00079563	0.0135257	0.0102362	K02991/K02144/K00444/K10421/K02149/K02147/K04456/K20404/K02145	9
C60 (1 mg/L)	ko05225	Hepatocellular carcinoma	9/263	114/12191	0.00079563	0.0135257	0.0102362	K05692/K00444/K03511/K17448/K11651/K11653/K11647/K00799/K04456	9
C60 (1 mg/L)	ko05120	Epithelial cell signaling in Helicobacter pylori infection	8/263	90/12191	0.000710092	0.0135257	0.0102362	K02144/K04392/K06704/K06059/K02149/K02147/K04448/K02145	8
C60 (1 mg/L)	ko04140	Autophagy - animal	8/263	100/12191	0.00141747	0.0192024	0.0145323	K17606/K10802/K17908/K01365/K04427/K07897/K04456/K08860	8
C60 (1 mg/L)	ko00010	Glycolysis / Gluconeogenesis	8/263	103/12191	0.00171372	0.0209759	0.0158745	K01623/K00382/K00134/K01689/K00128/K01895/K01834/K14085	8
C60 (1 mg/L)	ko05164	Influenza A	8/263	124/12191	0.0053962	0.0471782	0.0357042	K05692/K03283/K14396/K04431/K12646/K04456/K08860/K04448	8
C60 (1 mg/L)	ko04520	Adherens junction	7/263	60/12191	0.000292168	0.00812758	0.0061509	K05692/K05699/K05700/K04392/K04427/K05705/K05693	7
C60 (1 mg/L)	ko04620	Toll-like receptor signaling pathway	7/263	76/12191	0.0012348	0.0188925	0.0142977	K04392/K04427/K04431/K04730/K04398/K04456/K04448	7
C60 (1 mg/L)	ko04915	Estrogen signaling pathway	7/263	76/12191	0.0012348	0.0188925	0.0142977	K04079/K03283/K02183/K08041/K17448/K04456/K04448	7
C60 (1 mg/L)	ko04722	Neurotrophin signaling pathway	7/263	90/12191	0.00327183	0.0325064	0.0246006	K04392/K02183/K04431/K17448/K04730/K04456/K04448	7
C60 (1 mg/L)	ko04261	Adrenergic signaling in cardiomyocytes	7/263	92/12191	0.00369977	0.035379	0.0267746	K04962/K02183/K10373/K08041/K01539/K17751/K04456	7
C60 (1 mg/L)	ko04217	Necroptosis	7/263	96/12191	0.00468196	0.0434146	0.0328559	K10802/K04079/K00522/K10798/K00688/K11224/K04398	7
C60 (1 mg/L)	ko05416	Viral myocarditis	6/263	38/12191	0.000147183	0.00562976	0.00426057	K05692/K04392/K03260/K04398/K17751/K06265	6
C60 (1 mg/L)	ko04721	Synaptic vesicle cycle	6/263	40/12191	0.000197387	0.00654766	0.00495523	K02144/K04646/K02149/K02147/K06027/K02145	6
C60 (1 mg/L)	ko05110	Vibrio cholerae infection	6/263	48/12191	0.000546383	0.0119424	0.00903791	K05692/K02144/K09582/K02149/K02147/K02145	6
C60 (1 mg/L)	ko00020	Citrate cycle (TCA cycle)	6/263	58/12191	0.00150607	0.0192024	0.0145323	K01681/K01900/K00382/K00235/K00025/K01899	6
C60 (1 mg/L)	ko05323	Rheumatoid arthritis	6/263	65/12191	0.00271179	0.0296359	0.0224283	K02144/K01365/K02149/K02147/K04448/K02145	6
C60 (1 mg/L)	ko04612	Antigen processing and presentation	5/263	41/12191	0.0017866	0.021027	0.0159131	K04079/K03283/K01365/K08057/K08056	5
C60 (1 mg/L)	ko00410	beta-Alanine metabolism	5/263	43/12191	0.00221601	0.0251148	0.0190068	K01464/K00802/K08660/K00128/K14085	5
C60 (1 mg/L)	ko00480	Glutathione metabolism	5/263	46/12191	0.00299458	0.031598	0.0239131	K04097/K05361/K00802/K01255/K00799	5
C60 (1 mg/L)	ko04624	Toll and Imd signaling pathway	5/263	47/12191	0.00329313	0.0325064	0.0246006	K04427/K04431/K04730/K04398/K04448	5
C60 (1 mg/L)	ko04966	Collecting duct acid secretion	3/263	17/12191	0.00539506	0.0471782	0.0357042	K02149/K02147/K02145	3
BaP (5 µg) & C60 (1 mg/mL)	ko03010	Ribosome	29/297	143/12190	6.04289e-19	1.93372e-16	1.46938e-16	K02964/K02900/K02934/K02969/K02936/K02893/K02901/K02917/K02930/K02889/K02941/K02865/K02923/K02953/K02938/K02872/K02870/K02918/K02955/K02991/K02937/K02911/K02896/K02987/K02922/K02873/K02882/K02932/K02863	29
BaP (5 µg) & C60 (1 mg/mL)	ko04141	Protein processing in endoplasmic reticulum	20/297	140/12190	1.70432e-10	2.72691e-08	2.07209e-08	K09490/K13250/K12666/K09582/K01230/K13993/K04079/K09481/K09486/K03283/K10082/K09027/K04431/K13984/K08057/K03173/K13525/K10956/K08860/K14011	20
BaP (5 µg) & C60 (1 mg/mL)	ko05200	Pathways in cancer	19/297	409/12190	0.00544279	0.0385167	0.0292676	K04392/K02157/K04397/K08775/K04079/K04398/K00444/K06054/K19464/K04261/K00799/K03511/K03174/K02649/K03173/K02183/K01116/K04513/K04707	19
BaP (5 µg) & C60 (1 mg/mL)	ko01230	Biosynthesis of amino acids	16/297	230/12190	0.000162595	0.00404585	0.00307431	K00134/K00616/K01623/K00817/K01681/K01689/K00640/K00500/K00031/K14454/K01652/K00286/K01755/K00927/K00814/K01803	16
BaP (5 µg) & C60 (1 mg/mL)	ko05205	Proteoglycans in cancer	14/297	162/12190	4.15575e-05	0.00148106	0.00112541	K04437/K04392/K05762/K05692/K00444/K01365/K10380/K02991/K05860/K02649/K12823/K01116/K04513/K04707	14
BaP (5 µg) & C60 (1 mg/mL)	ko05165	Human papillomavirus infection	13/297	239/12190	0.005794	0.0386267	0.0293512	K02157/K02144/K04398/K06238/K00444/K04728/K02149/K06054/K04261/K03174/K06069/K02649/K02145	13
BaP (5 µg) & C60 (1 mg/mL)	ko03040	Spliceosome	12/297	122/12190	4.16548e-05	0.00148106	0.00112541	K12878/K12812/K12831/K12882/K12822/K12896/K03283/K12843/K12875/K11984/K19604/K12823	12
BaP (5 µg) & C60 (1 mg/mL)	ko03013	RNA transport	12/297	138/12190	0.000138227	0.00402116	0.00305555	K12878/K12812/K12882/K05749/K00784/K12875/K03241/K14527/K14310/K14323/K03251/K14315	12
BaP (5 µg) & C60 (1 mg/mL)	ko05010	Alzheimer disease	12/297	143/12190	0.00019358	0.00404585	0.00307431	K00134/K02262/K04397/K00237/K02132/K04398/K02133/K06059/K06704/K08860/K02256/K02183	12
BaP (5 µg) & C60 (1 mg/mL)	ko04910	Insulin signaling pathway	11/297	87/12190	8.05966e-06	0.000644773	0.000489943	K00693/K01596/K00665/K00688/K03841/K02991/K06069/K07204/K02649/K02183/K04707	11
BaP (5 µg) & C60 (1 mg/mL)	ko04145	Phagosome	11/297	95/12190	1.89076e-05	0.000987755	0.000750564	K04392/K02144/K05692/K09481/K02149/K01365/K12182/K02145/K07897/K08057/K10956	11
BaP (5 µg) & C60 (1 mg/mL)	ko05170	Human immunodeficiency virus 1 infection	11/297	163/12190	0.00215358	0.0229716	0.0174554	K04427/K04392/K04398/K04728/K17834/K04431/K02649/K08057/K03173/K02183/K01116	11
BaP (5 µg) & C60 (1 mg/mL)	ko04144	Endocytosis	11/297	164/12190	0.00225966	0.0233255	0.0177243	K18464/K04646/K13712/K03283/K18462/K05755/K12182/K06069/K07897/K04513/K04707	11
BaP (5 µg) & C60 (1 mg/mL)	ko05203	Viral carcinogenesis	11/297	174/12190	0.00357209	0.0293094	0.0222713	K04392/K05768/K05699/K15306/K06630/K04398/K03174/K03136/K02649/K03173/K04513	11
BaP (5 µg) & C60 (1 mg/mL)	ko04714	Thermogenesis	11/297	185/12190	0.00565714	0.0385167	0.0292676	K03881/K02262/K00237/K11651/K02132/K05692/K02133/K02991/K07204/K01897/K02256	11
BaP (5 µg) & C60 (1 mg/mL)	ko05418	Fluid shear stress and atherosclerosis	10/297	98/12190	0.000133647	0.00402116	0.00305555	K04427/K04392/K05692/K04079/K01365/K00799/K04431/K02649/K02183/K04513	10
BaP (5 µg) & C60 (1 mg/mL)	ko04530	Tight junction	10/297	101/12190	0.000171941	0.00404585	0.00307431	K04392/K05699/K05762/K05692/K09489/K04431/K16684/K06069/K10352/K04513	10
BaP (5 µg) & C60 (1 mg/mL)	ko00010	Glycolysis / Gluconeogenesis	10/297	103/12190	0.000202292	0.00404585	0.00307431	K00134/K01895/K01623/K01596/K01689/K03841/K01835/K00927/K01803/K00128	10
BaP (5 µg) & C60 (1 mg/mL)	ko04210	Apoptosis	10/297	109/12190	0.000321608	0.00605379	0.00460008	K04397/K05692/K04398/K04728/K10798/K01365/K02308/K02649/K03173/K08860	10
BaP (5 µg) & C60 (1 mg/mL)	ko04932	Non-alcoholic fatty liver disease (NAFLD)	10/297	124/12190	0.000894034	0.0143045	0.0108696	K04392/K02262/K04397/K00237/K04398/K09027/K02649/K03173/K08860/K02256	10
BaP (5 µg) & C60 (1 mg/mL)	ko04621	NOD-like receptor signaling pathway	10/297	136/12190	0.00180447	0.0228554	0.0173671	K04427/K17065/K04079/K04398/K04977/K03174/K20915/K03173/K20876/K04513	10
BaP (5 µg) & C60 (1 mg/mL)	ko05016	Huntington disease	10/297	149/12190	0.0035175	0.0293094	0.0222713	K02262/K00237/K02132/K04646/K04398/K04565/K02133/K10408/K10410/K02256	10
BaP (5 µg) & C60 (1 mg/mL)	ko04810	Regulation of actin cytoskeleton	10/297	159/12190	0.00556031	0.0385167	0.0292676	K04392/K05768/K05699/K05762/K05692/K05749/K05755/K02649/K05769/K04513	10
BaP (5 µg) & C60 (1 mg/mL)	ko04214	Apoptosis - fly	9/297	56/12190	7.42882e-06	0.000644773	0.000489943	K04427/K04397/K17065/K04398/K04728/K10798/K10586/K04431/K08860	9
BaP (5 µg) & C60 (1 mg/mL)	ko04152	AMPK signaling pathway	9/297	84/12190	0.000198918	0.00404585	0.00307431	K04427/K00693/K01596/K00665/K03234/K00021/K03841/K07204/K02649	9
BaP (5 µg) & C60 (1 mg/mL)	ko04140	Autophagy - animal	9/297	100/12190	0.000732365	0.0123346	0.00937265	K04427/K10802/K01365/K08333/K17606/K07204/K02649/K07897/K08860	9
BaP (5 µg) & C60 (1 mg/mL)	ko04150	mTOR signaling pathway	9/297	114/12190	0.001857	0.0228554	0.0173671	K02144/K00444/K02149/K02991/K10421/K07204/K02649/K02145/K04513	9
BaP (5 µg) & C60 (1 mg/mL)	ko05225	Hepatocellular carcinoma	9/297	114/12190	0.001857	0.0228554	0.0173671	K02157/K11651/K05692/K00444/K00799/K03511/K11757/K02649/K01116	9
BaP (5 µg) & C60 (1 mg/mL)	ko04360	Axon guidance	9/297	122/12190	0.0029527	0.0285396	0.0216863	K04392/K07525/K00444/K16621/K02649/K06841/K06820/K01116/K04513	9
BaP (5 µg) & C60 (1 mg/mL)	ko05110	Vibrio cholerae infection	8/297	48/12190	1.82704e-05	0.000987755	0.000750564	K02144/K09582/K05692/K09481/K02149/K02145/K10956/K01116	8
BaP (5 µg) & C60 (1 mg/mL)	ko04919	Thyroid hormone signaling pathway	8/297	88/12190	0.00134252	0.0195275	0.0148383	K05692/K01539/K04650/K15162/K05857/K05860/K02649/K01116	8
BaP (5 µg) & C60 (1 mg/mL)	ko04668	TNF signaling pathway	8/297	90/12190	0.00155276	0.0216036	0.0164159	K04427/K04397/K17065/K04398/K04431/K03174/K02649/K03173	8
BaP (5 µg) & C60 (1 mg/mL)	ko04217	Necroptosis	8/297	96/12190	0.00234357	0.0234357	0.0178081	K17065/K10802/K04079/K04398/K10798/K00688/K03173/K16342	8
BaP (5 µg) & C60 (1 mg/mL)	ko00710	Carbon fixation in photosynthetic organisms	7/297	36/12190	2.16071e-05	0.000987755	0.000750564	K00134/K01623/K03841/K14454/K00927/K00814/K01803	7
BaP (5 µg) & C60 (1 mg/mL)	ko03015	mRNA surveillance pathway	7/297	59/12190	0.0005473	0.00972977	0.00739335	K12812/K12882/K14411/K08873/K11124/K12875/K14323	7
BaP (5 µg) & C60 (1 mg/mL)	ko04750	Inflammatory mediator regulation of TRP channels	7/297	67/12190	0.00118235	0.0180167	0.0136903	K04157/K04261/K02649/K16343/K16342/K02183/K01116	7
BaP (5 µg) & C60 (1 mg/mL)	ko05100	Bacterial invasion of epithelial cells	7/297	73/12190	0.00195723	0.0229716	0.0174554	K04392/K05692/K04646/K05755/K02649/K04513/K04707	7
BaP (5 µg) & C60 (1 mg/mL)	ko00562	Inositol phosphate metabolism	7/297	74/12190	0.00211762	0.0229716	0.0174554	K13712/K10572/K05857/K05860/K01803/K01116/K00469	7
BaP (5 µg) & C60 (1 mg/mL)	ko04657	IL-17 signaling pathway	7/297	81/12190	0.00354285	0.0293094	0.0222713	K04427/K11849/K04079/K04398/K03174/K03173/K21124	7
BaP (5 µg) & C60 (1 mg/mL)	ko04722	Neurotrophin signaling pathway	7/297	90/12190	0.00632912	0.0405064	0.0307795	K04392/K06630/K04431/K02649/K02183/K01116/K04513	7
BaP (5 µg) & C60 (1 mg/mL)	ko05120	Epithelial cell signaling in Helicobacter pylori infection	7/297	90/12190	0.00632912	0.0405064	0.0307795	K04392/K02144/K02149/K06059/K06704/K02145/K01116	7
BaP (5 µg) & C60 (1 mg/mL)	ko04070	Phosphatidylinositol signaling system	6/297	55/12190	0.00211475	0.0229716	0.0174554	K10572/K05857/K05860/K02649/K02183/K01116	6
BaP (5 µg) & C60 (1 mg/mL)	ko04520	Adherens junction	6/297	60/12190	0.0033005	0.0293094	0.0222713	K04427/K04392/K05699/K05692/K05693/K04513	6
BaP (5 µg) & C60 (1 mg/mL)	ko04612	Antigen processing and presentation	5/297	41/12190	0.00303233	0.0285396	0.0216863	K04079/K09489/K03283/K01365/K08057	5
BaP (5 µg) & C60 (1 mg/mL)	ko03410	Base excision repair	5/297	42/12190	0.00337475	0.0293094	0.0222713	K10802/K10798/K10747/K01151/K04799	5
BaP (5 µg) & C60 (1 mg/mL)	ko01524	Platinum drug resistance	5/297	45/12190	0.00456827	0.0356548	0.0270929	K04398/K04728/K00799/K02649/K03164	5
BaP (5 µg) & C60 (1 mg/mL)	ko00480	Glutathione metabolism	5/297	46/12190	0.00502533	0.0382882	0.029094	K01255/K05361/K00802/K00799/K00031	5
BaP (5 µg) & C60 (1 mg/mL)	ko04664	Fc epsilon RI signaling pathway	5/297	47/12190	0.00551389	0.0385167	0.0292676	K04392/K04431/K02649/K16342/K01116	5
BaP (5 µg) & C60 (1 mg/mL)	ko04964	Proximal tubule bicarbonate reclamation	3/297	14/12190	0.00426933	0.0341547	0.0259531	K01596/K12040/K01539	3
BaP (5 µg) & C60 (1 mg/mL)	ko00531	Glycosaminoglycan degradation	3/297	15/12190	0.00524137	0.0385167	0.0292676	K12373/K01135/K01207	3
BaP (50 µg) & C60 (1 mg/mL)	ko03010	Ribosome	25/375	143/12190	1.38118e-12	4.55788e-10	3.27121e-10	K02900/K02889/K02991/K02969/K02917/K02997/K02964/K02923/K02953/K02870/K02981/K02906/K02865/K02937/K02891/K02888/K02993/K02903/K02915/K02882/K02954/K02942/K02988/K02987/K02966	25
BaP (50 µg) & C60 (1 mg/mL)	ko01200	Carbon metabolism	23/375	349/12190	0.000497088	0.00780665	0.00560286	K00134/K01895/K00616/K00237/K01900/K01623/K01681/K00382/K00235/K00140/K00640/K03841/K01966/K00025/K00873/K00033/K01689/K01803/K00863/K00814/K00031/K01595/K00927	23
BaP (50 µg) & C60 (1 mg/mL)	ko04141	Protein processing in endoplasmic reticulum	19/375	140/12190	5.4e-08	8.91e-06	6.39474e-06	K03283/K13250/K12666/K09582/K12670/K01230/K04426/K04079/K08056/K09486/K09556/K09490/K10082/K09027/K11718/K09503/K08057/K01456/K04431	19
BaP (50 µg) & C60 (1 mg/mL)	ko01230	Biosynthesis of amino acids	17/375	230/12190	0.000759344	0.010441	0.00749352	K00134/K00616/K00789/K01623/K00264/K00817/K01953/K01681/K01940/K00640/K00500/K00873/K01689/K01803/K00814/K00031/K00927	17
BaP (50 µg) & C60 (1 mg/mL)	ko03013	RNA transport	16/375	138/12190	5.11146e-06	0.000421695	0.000302652	K12878/K12882/K05749/K00784/K03231/K03254/K12875/K03241/K09291/K13126/K13171/K14323/K03260/K12879/K14293/K03251	16
BaP (50 µg) & C60 (1 mg/mL)	ko03040	Spliceosome	15/375	122/12190	4.86862e-06	0.000421695	0.000302652	K03283/K12878/K12831/K12882/K12822/K12896/K12828/K12818/K12875/K11984/K11093/K12858/K12879/K12733/K11088	15
BaP (50 µg) & C60 (1 mg/mL)	ko04932	Non-alcoholic fatty liver disease (NAFLD)	14/375	124/12190	2.69119e-05	0.00126871	0.000910554	K04448/K04392/K02262/K04397/K00237/K03945/K04426/K04398/K00235/K09027/K02649/K02580/K02256/K07197	14
BaP (50 µg) & C60 (1 mg/mL)	ko05010	Alzheimer disease	14/375	143/12190	0.000129693	0.00375268	0.00269331	K00134/K02262/K04397/K00237/K03945/K02132/K04398/K02183/K02133/K00235/K06059/K06704/K04550/K02256	14
BaP (50 µg) & C60 (1 mg/mL)	ko04714	Thermogenesis	14/375	185/12190	0.00173916	0.0193638	0.0138975	K02991/K02262/K00237/K03945/K08041/K02132/K04426/K02133/K00235/K05692/K03879/K02257/K02256/K08765	14
BaP (50 µg) & C60 (1 mg/mL)	ko05418	Fluid shear stress and atherosclerosis	13/375	98/12190	9.04604e-06	0.000582126	0.000417793	K04448/K04392/K04426/K04079/K02183/K04467/K00799/K01940/K05692/K02649/K13596/K02580/K04431	13
BaP (50 µg) & C60 (1 mg/mL)	ko05170	Human immunodeficiency virus 1 infection	13/375	163/12190	0.00157332	0.0185426	0.0133081	K04448/K04392/K04398/K02183/K08056/K17834/K04467/K12392/K02649/K04733/K08057/K02580/K04431	13
BaP (50 µg) & C60 (1 mg/mL)	ko05169	Epstein-Barr virus infection	13/375	171/12190	0.00241062	0.0233972	0.0167923	K04448/K04392/K06066/K04398/K08056/K04467/K03511/K02649/K03028/K04733/K08057/K02580/K04431	13
BaP (50 µg) & C60 (1 mg/mL)	ko04530	Tight junction	12/375	101/12190	6.0921e-05	0.00223377	0.00160318	K04448/K04392/K05762/K04426/K09489/K17260/K05692/K10352/K03456/K04431/K05702/K16684	12
BaP (50 µg) & C60 (1 mg/mL)	ko04152	AMPK signaling pathway	11/375	84/12190	4.99729e-05	0.00206138	0.00147946	K07877/K01596/K00665/K00021/K07905/K11262/K03841/K02649/K03456/K08765/K07197	11
BaP (50 µg) & C60 (1 mg/mL)	ko00010	Glycolysis / Gluconeogenesis	11/375	103/12190	0.000318757	0.00584387	0.00419416	K00134/K01895/K01596/K01623/K00382/K14085/K03841/K00873/K01689/K01803/K00927	11
BaP (50 µg) & C60 (1 mg/mL)	ko04210	Apoptosis	11/375	109/12190	0.000520443	0.00780665	0.00560286	K04448/K04397/K04426/K04398/K10798/K04467/K05692/K04396/K01173/K02649/K02580	11
BaP (50 µg) & C60 (1 mg/mL)	ko05142	Chagas disease (American trypanosomiasis)	10/375	82/12190	0.000200267	0.0050837	0.00364859	K03990/K04448/K08041/K04398/K04467/K02649/K04733/K08057/K02580/K03456	10
BaP (50 µg) & C60 (1 mg/mL)	ko04360	Axon guidance	10/375	122/12190	0.0043677	0.0400372	0.0287348	K04392/K06820/K00444/K06839/K07526/K02649/K06841/K16621/K05703/K04352	10
BaP (50 µg) & C60 (1 mg/mL)	ko03015	mRNA surveillance pathway	9/375	59/12190	7.22395e-05	0.0023839	0.00171094	K12882/K14411/K14396/K12875/K13126/K14376/K13171/K14323/K03456	9
BaP (50 µg) & C60 (1 mg/mL)	ko05134	Legionellosis	9/375	68/12190	0.000222091	0.00523501	0.00375718	K03990/K03283/K04397/K04398/K03233/K03231/K07874/K04077/K02580	9
BaP (50 µg) & C60 (1 mg/mL)	ko00562	Inositol phosphate metabolism	9/375	74/12190	0.000423631	0.00698992	0.00501669	K01109/K13712/K00140/K00889/K10572/K00923/K00911/K05860/K01803	9
BaP (50 µg) & C60 (1 mg/mL)	ko04910	Insulin signaling pathway	9/375	87/12190	0.00138565	0.0177914	0.0127689	K02991/K01596/K02183/K00665/K11262/K00688/K03841/K02649/K07197	9
BaP (50 µg) & C60 (1 mg/mL)	ko04668	TNF signaling pathway	9/375	90/12190	0.00176035	0.0193638	0.0138975	K04448/K04397/K04426/K04398/K04467/K07763/K02649/K02580/K04431	9
BaP (50 µg) & C60 (1 mg/mL)	ko00710	Carbon fixation in photosynthetic organisms	8/375	36/12190	1.05841e-05	0.000582126	0.000417793	K00134/K01623/K03841/K00025/K01803/K00814/K01595/K00927	8
BaP (50 µg) & C60 (1 mg/mL)	ko04070	Phosphatidylinositol signaling system	8/375	55/12190	0.000255758	0.00562668	0.00403829	K01109/K02183/K00889/K10572/K00923/K00911/K05860/K02649	8
BaP (50 µg) & C60 (1 mg/mL)	ko04214	Apoptosis - fly	8/375	56/12190	0.000290511	0.00584387	0.00419416	K04448/K04397/K04426/K04398/K10798/K10586/K04431/K03386	8
BaP (50 µg) & C60 (1 mg/mL)	ko00020	Citrate cycle (TCA cycle)	8/375	58/12190	0.000371607	0.00645423	0.00463222	K01596/K00237/K01900/K01681/K00382/K00235/K00025/K00031	8
BaP (50 µg) & C60 (1 mg/mL)	ko04620	Toll-like receptor signaling pathway	8/375	76/12190	0.00226369	0.0233443	0.0167543	K04448/K04392/K04398/K04467/K02649/K04733/K02580/K04431	8
BaP (50 µg) & C60 (1 mg/mL)	ko05416	Viral myocarditis	7/375	38/12190	0.000136461	0.00375268	0.00269331	K04392/K04398/K06265/K05692/K17751/K03260/K05703	7
BaP (50 µg) & C60 (1 mg/mL)	ko04922	Glucagon signaling pathway	7/375	55/12190	0.00140175	0.0177914	0.0127689	K01596/K02183/K11262/K00688/K00873/K16311/K08765	7
BaP (50 µg) & C60 (1 mg/mL)	ko04974	Protein digestion and absorption	7/375	56/12190	0.00156049	0.0185426	0.0133081	K08132/K01539/K12040/K06238/K05849/K14210/K19721	7
BaP (50 µg) & C60 (1 mg/mL)	ko04260	Cardiac muscle contraction	7/375	60/12190	0.00233996	0.0233972	0.0167923	K10373/K02262/K12314/K01539/K04962/K17751/K02256	7
BaP (50 µg) & C60 (1 mg/mL)	ko00250	Alanine, aspartate and glutamate metabolism	7/375	68/12190	0.00476548	0.0413844	0.0297017	K00264/K01953/K01580/K01940/K00139/K00814/K01756	7
BaP (50 µg) & C60 (1 mg/mL)	ko00983	Drug metabolism - other enzymes	6/375	31/12190	0.000312231	0.00584387	0.00419416	K01520/K00799/K01044/K01464/K03927/K00876	6
BaP (50 µg) & C60 (1 mg/mL)	ko00410	beta-Alanine metabolism	6/375	43/12190	0.0018953	0.0201758	0.0144803	K01580/K08660/K00140/K14085/K01464/K14755	6
BaP (50 µg) & C60 (1 mg/mL)	ko04624	Toll and Imd signaling pathway	6/375	47/12190	0.0030115	0.0283941	0.0203786	K04448/K04398/K10380/K04733/K02580/K04431	6
BaP (50 µg) & C60 (1 mg/mL)	ko00513	Various types of N-glycan biosynthesis	6/375	51/12190	0.00455791	0.0406516	0.0291758	K12666/K12670/K01230/K13748/K12373/K01231	6
BaP (50 µg) & C60 (1 mg/mL)	ko04964	Proximal tubule bicarbonate reclamation	4/375	14/12190	0.000690533	0.00990764	0.00711075	K01596/K01539/K12040/K00025	4
BaP (100 µg) & C60 (1 mg/mL)	ko03010	Ribosome	25/379	143/12190	1.74837e-12	5.80459e-10	3.93843e-10	K02889/K02930/K02964/K02997/K02923/K02953/K02938/K02870/K02918/K02977/K02906/K02865/K02987/K02875/K02880/K02872/K02866/K02882/K02891/K02954/K02915/K02890/K02912/K02937/K02894	25
BaP (100 µg) & C60 (1 mg/mL)	ko05200	Pathways in cancer	23/379	409/12190	0.00450138	0.0355824	0.0241428	K04448/K04392/K04397/K16061/K08041/K08775/K05636/K04079/K00444/K04261/K03511/K02183/K00799/K06618/K06237/K02599/K06620/K09455/K08735/K04467/K09848/K00922/K12331	23
BaP (100 µg) & C60 (1 mg/mL)	ko04010	MAPK signaling pathway	17/379	235/12190	0.0010836	0.0156415	0.0106128	K04427/K04448/K04392/K04459/K03283/K04437/K04426/K04349/K04527/K02308/K05866/K04851/K04467/K04429/K04405/K04431/K04353	17
BaP (100 µg) & C60 (1 mg/mL)	ko05165	Human papillomavirus infection	17/379	239/12190	0.00130312	0.0173054	0.0117418	K02144/K06093/K05636/K10691/K00444/K04261/K00873/K06238/K06618/K10587/K06237/K02599/K06094/K04467/K02152/K00922/K03456	17
BaP (100 µg) & C60 (1 mg/mL)	ko04144	Endocytosis	16/379	164/12190	5.14758e-05	0.00284833	0.0019326	K11839/K03283/K18464/K06093/K06564/K13712/K17917/K07905/K18441/K18462/K05755/K12182/K00889/K01115/K18468/K17920	16
BaP (100 µg) & C60 (1 mg/mL)	ko04141	Protein processing in endoplasmic reticulum	15/379	140/12190	2.95874e-05	0.0019646	0.00133299	K12666/K03283/K01230/K04426/K04079/K09580/K13250/K09490/K09584/K10082/K09027/K13984/K09521/K04431/K08057	15
BaP (100 µg) & C60 (1 mg/mL)	ko01230	Biosynthesis of amino acids	15/379	230/12190	0.00554527	0.0378238	0.0256636	K00616/K00789/K01623/K00264/K00817/K01953/K00640/K00500/K00031/K00873/K01689/K00134/K00615/K00927/K00814	15
BaP (100 µg) & C60 (1 mg/mL)	ko05010	Alzheimer disease	14/379	143/12190	0.000144938	0.00534659	0.00362768	K02262/K04397/K02132/K00235/K06059/K06704/K02183/K00234/K02128/K00134/K04851/K04550/K02256/K03954	14
BaP (100 µg) & C60 (1 mg/mL)	ko05169	Epstein-Barr virus infection	14/379	171/12190	0.000903556	0.0154285	0.0104683	K04427/K04448/K04392/K03066/K06066/K03511/K06691/K06618/K06620/K04467/K04431/K02861/K08057/K00922	14
BaP (100 µg) & C60 (1 mg/mL)	ko04530	Tight junction	13/379	101/12190	1.41506e-05	0.0011745	0.000796904	K04448/K04392/K05762/K06093/K04426/K09489/K17260/K05692/K06094/K04851/K04431/K04353/K03456	13
BaP (100 µg) & C60 (1 mg/mL)	ko04932	Non-alcoholic fatty liver disease (NAFLD)	13/379	124/12190	0.000124888	0.00518285	0.00351658	K04448/K04392/K02262/K04397/K04426/K00235/K09027/K04527/K00234/K07197/K02256/K03954/K00922	13
BaP (100 µg) & C60 (1 mg/mL)	ko05203	Viral carcinogenesis	13/379	174/12190	0.00307386	0.0261672	0.0177546	K04448/K04392/K05768/K15306/K06630/K10691/K12886/K03363/K00873/K06618/K10587/K09254/K00922	13
BaP (100 µg) & C60 (1 mg/mL)	ko04152	AMPK signaling pathway	12/379	84/12190	1.02794e-05	0.00113758	0.000771855	K04427/K07877/K00665/K03234/K00021/K07905/K11262/K04527/K07197/K01596/K00922/K03456	12
BaP (100 µg) & C60 (1 mg/mL)	ko03040	Spliceosome	12/379	122/12190	0.000409366	0.0104546	0.00709347	K03283/K12878/K12831/K12882/K12886/K12896/K12818/K12843/K12875/K11984/K12830/K11093	12
BaP (100 µg) & C60 (1 mg/mL)	ko03013	RNA transport	12/379	138/12190	0.00123184	0.0170405	0.011562	K12878/K12882/K00784/K03231/K03254/K12875/K03241/K13126/K03245/K03248/K03251/K13171	12
BaP (100 µg) & C60 (1 mg/mL)	ko04024	cAMP signaling pathway	12/379	147/12190	0.00211407	0.0206384	0.0140032	K04448/K04392/K08041/K04962/K02183/K12323/K00232/K01115/K04851/K01539/K04353/K00922	12
BaP (100 µg) & C60 (1 mg/mL)	ko04510	Focal adhesion	12/379	148/12190	0.00223789	0.0206384	0.0140032	K04448/K04392/K05636/K04437/K04349/K05700/K05692/K06238/K06237/K04353/K00922/K00907	12
BaP (100 µg) & C60 (1 mg/mL)	ko05418	Fluid shear stress and atherosclerosis	11/379	98/12190	0.000225077	0.00747256	0.00507016	K04427/K04448/K04392/K04426/K04079/K05692/K02183/K00799/K04467/K04431/K00922	11
BaP (100 µg) & C60 (1 mg/mL)	ko04020	Calcium signaling pathway	11/379	143/12190	0.00502331	0.0367835	0.0249577	K08041/K04157/K09565/K16059/K04962/K02183/K05849/K04851/K04718/K00911/K00907	11
BaP (100 µg) & C60 (1 mg/mL)	ko05016	Huntington disease	11/379	149/12190	0.00680967	0.0428175	0.0290518	K02262/K10408/K02132/K09565/K04565/K00235/K00234/K02128/K02256/K03954/K10410	11
BaP (100 µg) & C60 (1 mg/mL)	ko04214	Apoptosis - fly	10/379	56/12190	7.4441e-06	0.00113758	0.000771855	K04427/K04448/K04397/K08791/K04426/K07611/K10586/K04431/K09848/K17065	10
BaP (100 µg) & C60 (1 mg/mL)	ko04921	Oxytocin signaling pathway	10/379	111/12190	0.00237378	0.0212998	0.014452	K04448/K08041/K03234/K04977/K04962/K05692/K02183/K12323/K04851/K00907	10
BaP (100 µg) & C60 (1 mg/mL)	ko03015	mRNA surveillance pathway	9/379	59/12190	7.83769e-05	0.0037173	0.0025222	K12882/K14411/K14396/K12875/K13126/K14376/K14401/K13171/K03456	9
BaP (100 µg) & C60 (1 mg/mL)	ko05222	Small cell lung cancer	9/379	74/12190	0.000457607	0.0104688	0.00710309	K16061/K05636/K03511/K06618/K06237/K06620/K04467/K09848/K00922	9
BaP (100 µg) & C60 (1 mg/mL)	ko05414	Dilated cardiomyopathy (DCM)	9/379	82/12190	0.000975899	0.0154285	0.0104683	K08041/K12314/K10373/K12567/K06265/K04962/K05692/K04851/K10366	9
BaP (100 µg) & C60 (1 mg/mL)	ko04668	TNF signaling pathway	9/379	90/12190	0.00189275	0.0205129	0.0139181	K04427/K04448/K04397/K04426/K04467/K04431/K02861/K17065/K00922	9
BaP (100 µg) & C60 (1 mg/mL)	ko04722	Neurotrophin signaling pathway	9/379	90/12190	0.00189275	0.0205129	0.0139181	K04448/K04392/K06630/K04426/K02183/K08888/K04431/K04353/K00922	9
BaP (100 µg) & C60 (1 mg/mL)	ko04261	Adrenergic signaling in cardiomyocytes	9/379	92/12190	0.00220542	0.0206384	0.0140032	K08041/K12314/K10373/K04962/K02183/K17751/K04851/K01539/K03456	9
BaP (100 µg) & C60 (1 mg/mL)	ko04140	Autophagy - animal	9/379	100/12190	0.00388921	0.0314931	0.0213682	K04427/K10802/K17589/K17908/K08333/K08509/K17606/K08342/K00922	9
BaP (100 µg) & C60 (1 mg/mL)	ko00010	Glycolysis / Gluconeogenesis	9/379	103/12190	0.00473198	0.0362065	0.0245663	K01623/K00382/K14085/K00128/K00873/K01689/K00134/K01596/K00927	9
BaP (100 µg) & C60 (1 mg/mL)	ko04210	Apoptosis	9/379	109/12190	0.00683821	0.0428175	0.0290518	K04448/K04397/K04426/K07611/K05692/K02308/K04467/K02861/K00922	9
BaP (100 µg) & C60 (1 mg/mL)	ko04974	Protein digestion and absorption	8/379	56/12190	0.000312051	0.00914473	0.00620473	K08132/K12040/K14206/K06238/K05849/K06237/K14210/K01539	8
BaP (100 µg) & C60 (1 mg/mL)	ko04260	Cardiac muscle contraction	8/379	60/12190	0.000504519	0.0104688	0.00710309	K02262/K12314/K10373/K04962/K17751/K04851/K02256/K01539	8
BaP (100 µg) & C60 (1 mg/mL)	ko04146	Peroxisome	8/379	73/12190	0.00186798	0.0205129	0.0139181	K01796/K13344/K13338/K04565/K00031/K00106/K00232/K12405	8
BaP (100 µg) & C60 (1 mg/mL)	ko05410	Hypertrophic cardiomyopathy (HCM)	8/379	73/12190	0.00186798	0.0205129	0.0139181	K12314/K10373/K12567/K06265/K04962/K05692/K04851/K10366	8
BaP (100 µg) & C60 (1 mg/mL)	ko00562	Inositol phosphate metabolism	8/379	74/12190	0.00203893	0.0205129	0.0139181	K01109/K13712/K00889/K20279/K10572/K00911/K00469/K00922	8
BaP (100 µg) & C60 (1 mg/mL)	ko04910	Insulin signaling pathway	8/379	87/12190	0.00558242	0.0378238	0.0256636	K00665/K11262/K00688/K02183/K04527/K07197/K01596/K00922	8
BaP (100 µg) & C60 (1 mg/mL)	ko00340	Histidine metabolism	7/379	46/12190	0.000499256	0.0104688	0.00710309	K00817/K14085/K00128/K11182/K00274/K08660/K01468	7
BaP (100 µg) & C60 (1 mg/mL)	ko04391	Hippo signaling pathway - fly	7/379	52/12190	0.00106372	0.0156415	0.0106128	K08791/K16674/K06630/K06093/K05692/K06094/K03456	7
BaP (100 µg) & C60 (1 mg/mL)	ko04070	Phosphatidylinositol signaling system	7/379	55/12190	0.00148993	0.0190253	0.0129087	K01109/K00889/K02183/K20279/K10572/K00911/K00922	7
BaP (100 µg) & C60 (1 mg/mL)	ko00020	Citrate cycle (TCA cycle)	7/379	58/12190	0.0020388	0.0205129	0.0139181	K01900/K00382/K00025/K00235/K00031/K00234/K01596	7
BaP (100 µg) & C60 (1 mg/mL)	ko04666	Fc gamma R-mediated phagocytosis	7/379	58/12190	0.0020388	0.0205129	0.0139181	K04392/K05768/K05755/K00889/K01115/K04718/K00922	7
BaP (100 µg) & C60 (1 mg/mL)	ko05212	Pancreatic cancer	7/379	61/12190	0.00273237	0.0238723	0.0161974	K04392/K08775/K03511/K06618/K06620/K04467/K00922	7
BaP (100 µg) & C60 (1 mg/mL)	ko00280	Valine, leucine and isoleucine degradation	7/379	69/12190	0.00547068	0.0378238	0.0256636	K00382/K14085/K00128/K01966/K01907/K00022/K07508	7
BaP (100 µg) & C60 (1 mg/mL)	ko00983	Drug metabolism - other enzymes	6/379	31/12190	0.000330533	0.00914473	0.00620473	K01520/K01044/K01464/K00106/K00799/K00569	6
BaP (100 µg) & C60 (1 mg/mL)	ko00710	Carbon fixation in photosynthetic organisms	6/379	36/12190	0.000767026	0.0141474	0.00959904	K01623/K00025/K00134/K00615/K00927/K00814	6
BaP (100 µg) & C60 (1 mg/mL)	ko04624	Toll and Imd signaling pathway	6/379	47/12190	0.0031739	0.0263434	0.0178741	K04427/K04448/K10380/K13411/K04431/K09254	6
BaP (100 µg) & C60 (1 mg/mL)	ko00513	Various types of N-glycan biosynthesis	6/379	51/12190	0.00479846	0.0362065	0.0245663	K12666/K01230/K13748/K01231/K14459/K12373	6
BaP (100 µg) & C60 (1 mg/mL)	ko03460	Fanconi anemia pathway	6/379	54/12190	0.00636709	0.0414485	0.0281229	K08775/K16618/K03511/K08991/K10896/K15363	6
BaP (100 µg) & C60 (1 mg/mL)	ko04922	Glucagon signaling pathway	6/379	55/12190	0.00696429	0.0428175	0.0290518	K11262/K00688/K02183/K00873/K16311/K01596	6
BaP (100 µg) & C60 (1 mg/mL)	ko05416	Viral myocarditis	5/379	38/12190	0.00610519	0.0405384	0.0275055	K04392/K06265/K05692/K17751/K10366	5
BaP (100 µg) & C60 (1 mg/mL)	ko04964	Proximal tubule bicarbonate reclamation	4/379	14/12190	0.000718674	0.0140353	0.00952299	K12040/K00025/K01539/K01596	4
BaP (100 µg) & C60 (1 mg/mL)	ko00531	Glycosaminoglycan degradation	4/379	15/12190	0.000956128	0.0154285	0.0104683	K01135/K12373/K10532/K01207	4
BaP (100 µg) & C60 (1 mg/mL)	ko04136	Autophagy - other	4/379	23/12190	0.0050965	0.0367835	0.0249577	K17908/K08333/K17606/K08342	4
